# Supplementary material for: New Hydroquinone Monoterpenoid and Cembranoid-Related Metabolites from the Soft Coral Sarcophyton tenuispiculatum
Source: PubMed Central journal article supplement (PMC7823492; doi:10.3390/md19010008), 2020-12-27
Supplement: marinedrugs-19-00008-s001.pdf [file marinedrugs-19-00008-s001.pdf]

# New hydroquinone monoterpenoid and cembranoid-related metabolites from the soft coral *Sarcophyton tenuispiculatum*

Tzu-Yin Huang <sup>1</sup>, Chiung-Yao Huang <sup>2</sup>, Shu-Rong Chen <sup>3</sup>, Jing-Ru Weng <sup>1,2</sup>, Tzu-Hsuan Tu <sup>4</sup>, Yuan-Bin Cheng <sup>2</sup>, Shih-Hsiung Wu <sup>5</sup> and Jyh-Horng Sheu <sup>1,2,3,6,\*</sup>

<sup>1</sup> Doctoral Degree Program in Marine Biotechnology, National Sun Yat-sen University, Kaohsiung 804, Taiwan; HuangTY@g-mail.nsysu.edu.tw (T.-Y.H.); jrweng@mail.nsysu.edu.tw (J.-R.W.)

<sup>2</sup> Department of Marine Biotechnology and Resources, National Sun Yat-sen University, Kaohsiung 804, Taiwan; huangcy@mail.nsysu.edu.tw (C.-Y.H.); jmb@kmu.edu.tw (Y.-B.C.)

<sup>3</sup> Graduate Institute of Natural Products, College of Pharmacy, Kaohsiung Medical University, Kaohsiung 807, Taiwan; u106831002@kmu.edu.tw

<sup>4</sup> Department of Oceanography, National Sun Yat-sen University, Kaohsiung 804, Taiwan; thtu@mail.nsysu.edu.tw

<sup>5</sup> Institute of Biological Chemistry, Academia Sinica, Taipei 11529, Taiwan; shwu@gate.sinica.edu.tw

<sup>6</sup> Department of Medical Research, China Medical University Hospital, China Medical University, Taichung 404, Taiwan

\* Correspondence: sheu@mail.nsysu.edu.tw; Tel.: +886-7-525-2000 (ext. 5030); Fax: +886-7-525-5020

# Compound 1 spectroscopic data

## FT-MS

### Analysis Info

Analysis Name D:\Data\1\SARCOFR325\_000003.d  
Method broadband first signal  
Sample Name Sarco-fr-3-25  
Comment ESI Positive

3/14/2018 3:36:51 PM

Instrument: FT-MS solariX

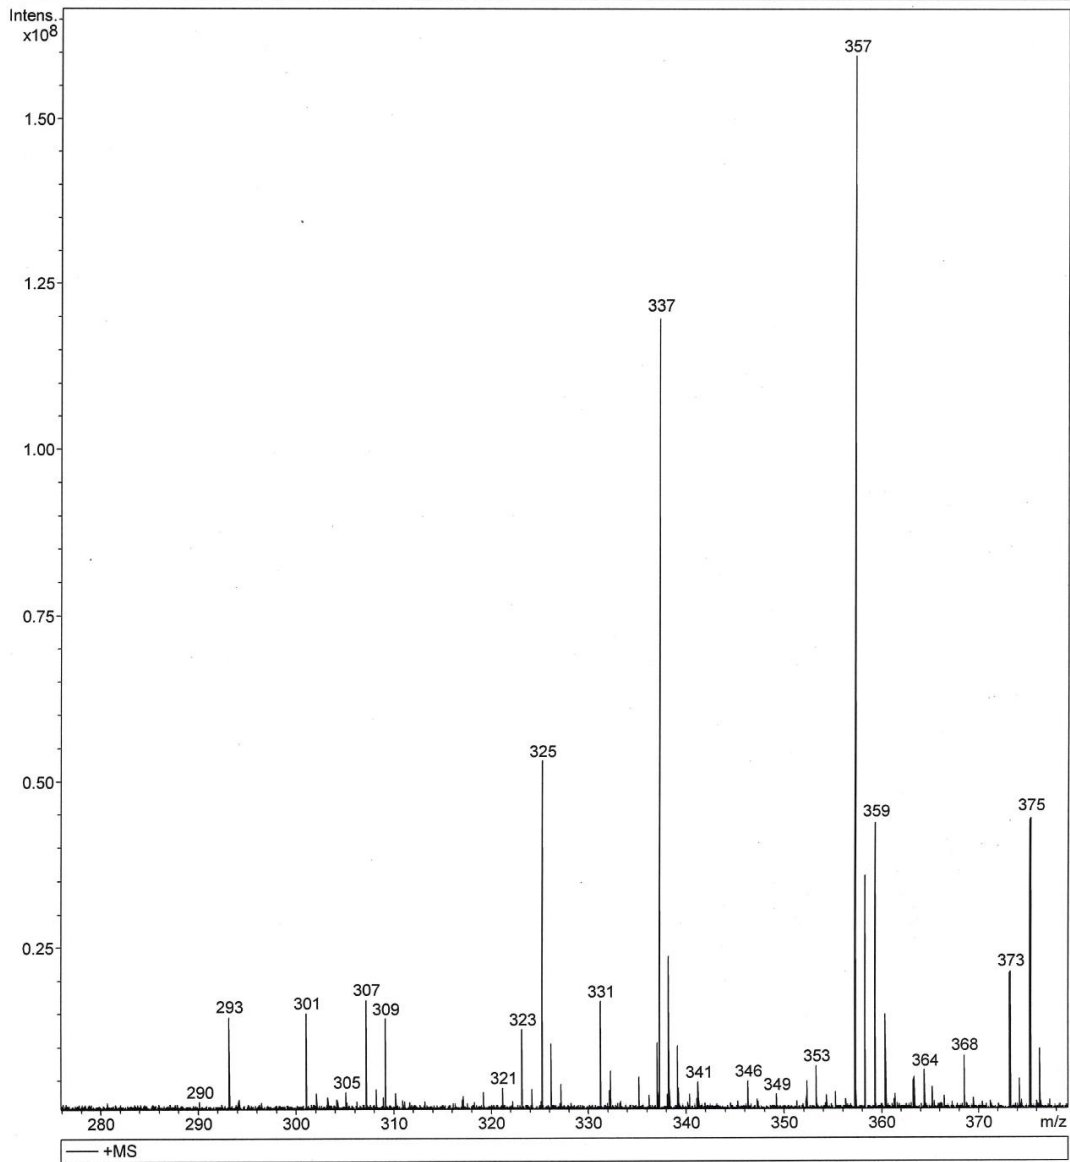

Figure S1: ESIMS spectrum of 1

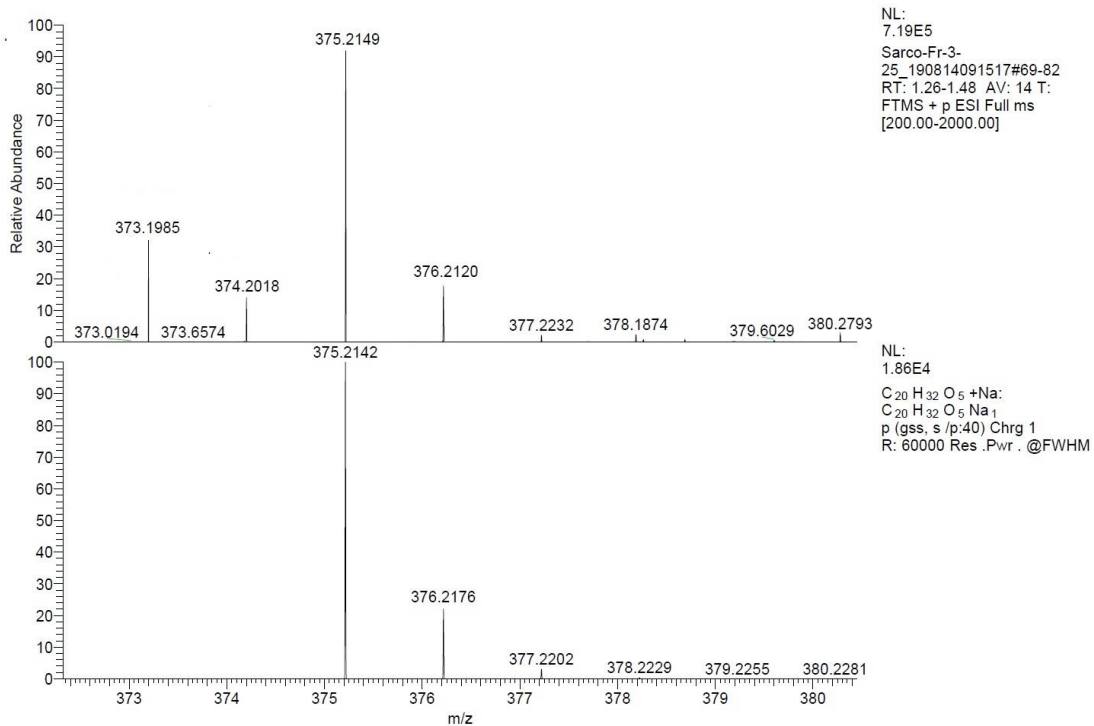

Figure S2: HRESIMS spectrum of 1

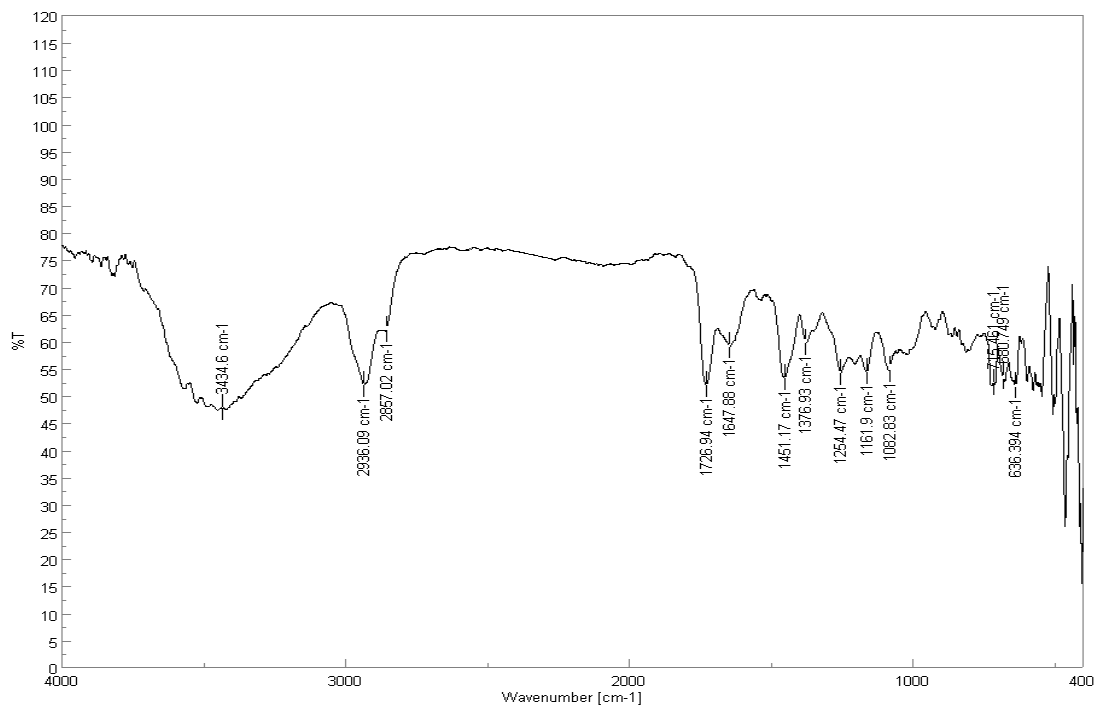

Figure S3: IR spectrum of 1

Sarco-Fr-3-25

Sample Name:  
Sarco-Fr-3-25  
Data Collected on:  
Varian-NMR-vnmrs400  
Archive directory:  
/home/sheu/vnmrsys/data  
Sample directory:  
Sarco-Fr-3-25\_20180405\_01  
FidFile: PROTON\_02

Pulse Sequence: PROTON (s2pul)  
Solvent: cdcl3  
Data collected on: Apr 5 2018

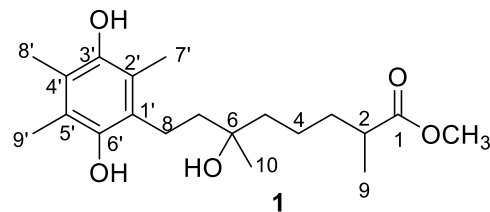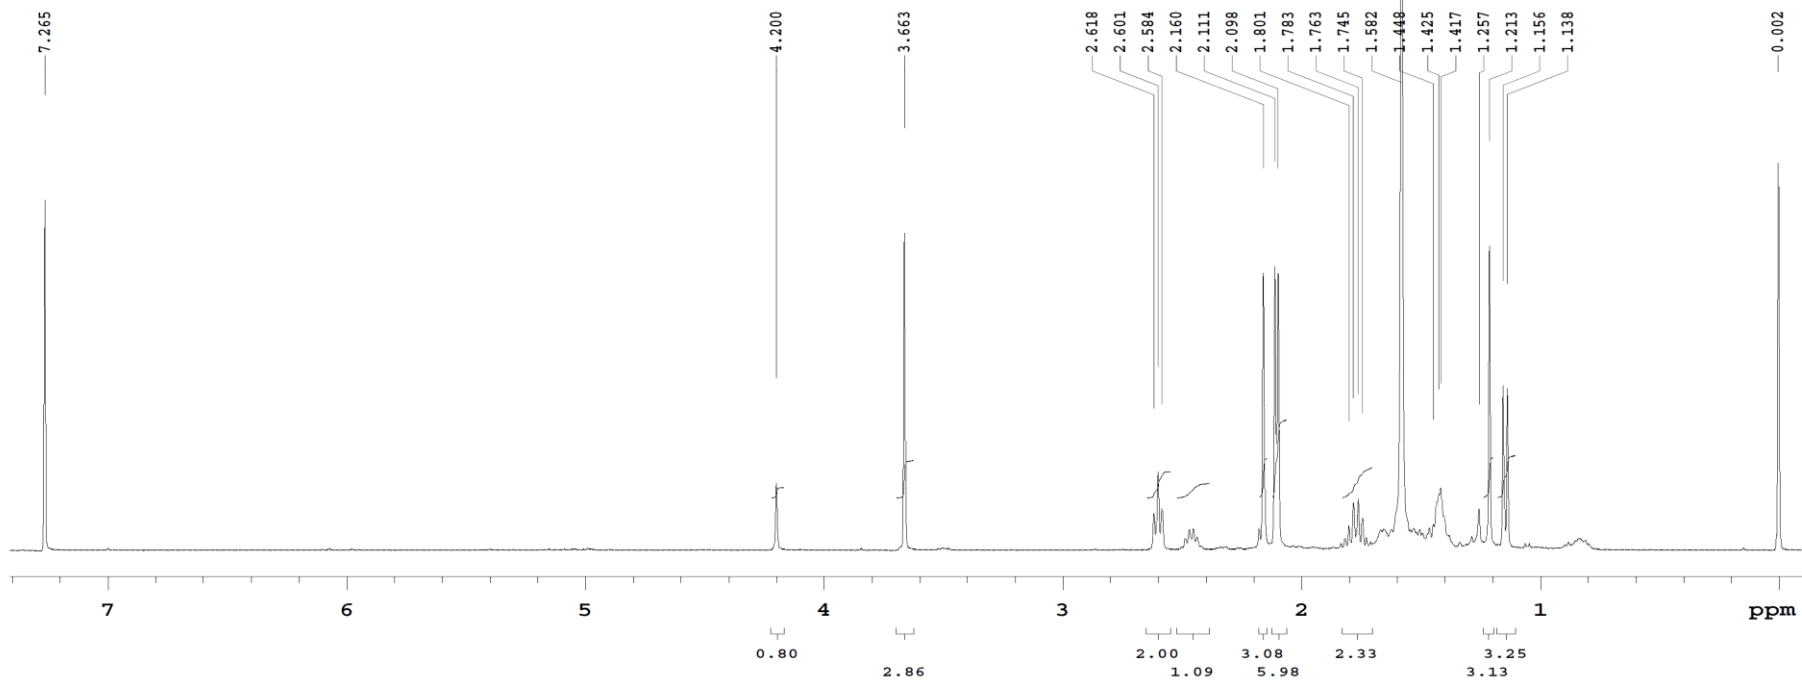

Figure S4: <sup>1</sup>H NMR spectrum of **1** in CDCl<sub>3</sub> at 400 MHz

Sarco-Fr-3-25

Sample Name:  
Sarco-Fr-3-25  
Data Collected on:  
Varian-NMR-vnmrs400  
Archive directory:  
/home/sheu/vnmrsys/data  
Sample directory:  
Sarco-Fr-3-25\_20180405\_01  
FidFile: PROTON\_02

Pulse Sequence: PROTON (s2pul)  
Solvent: cdcl3  
Data collected on: Apr 5 2018

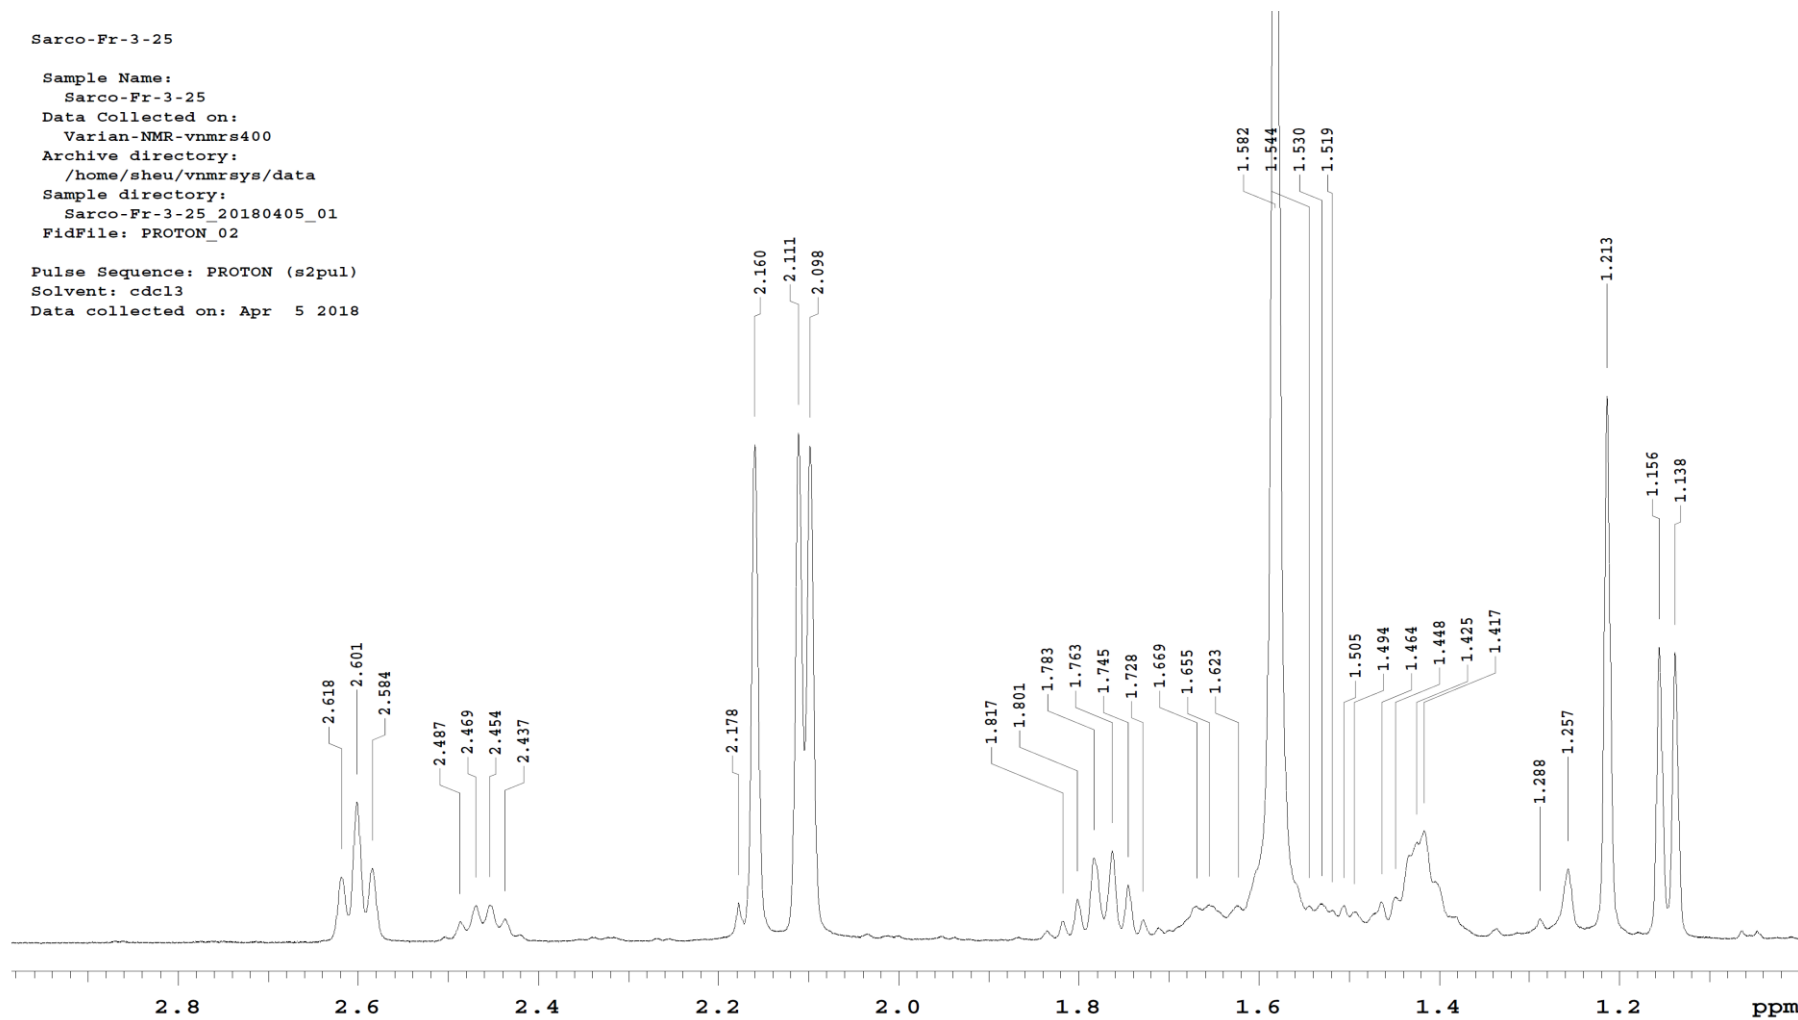

Figure S5: <sup>1</sup>H NMR spectrum (from 1.0 to 3.0 ppm) of 1 in CDCl<sub>3</sub> at 400 MHz

Figure S6:  $^{13}\text{C}$  NMR spectrum of **1** in  $\text{CDCl}_3$  at 100 MHz

Sarco-Fr-3-25

Sample Name:  
Sarco-Fr-3-25  
Data Collected on:  
Varian-NMR-vnmrs400  
Archive directory:  
/home/sheu/vnmrsys/data  
Sample directory:  
Sarco-Fr-3-25\_20180405\_01  
FidFile: DEPT\_01

Pulse Sequence: DEPT  
Solvent: cdcl3  
Data collected on: Apr 6 2018

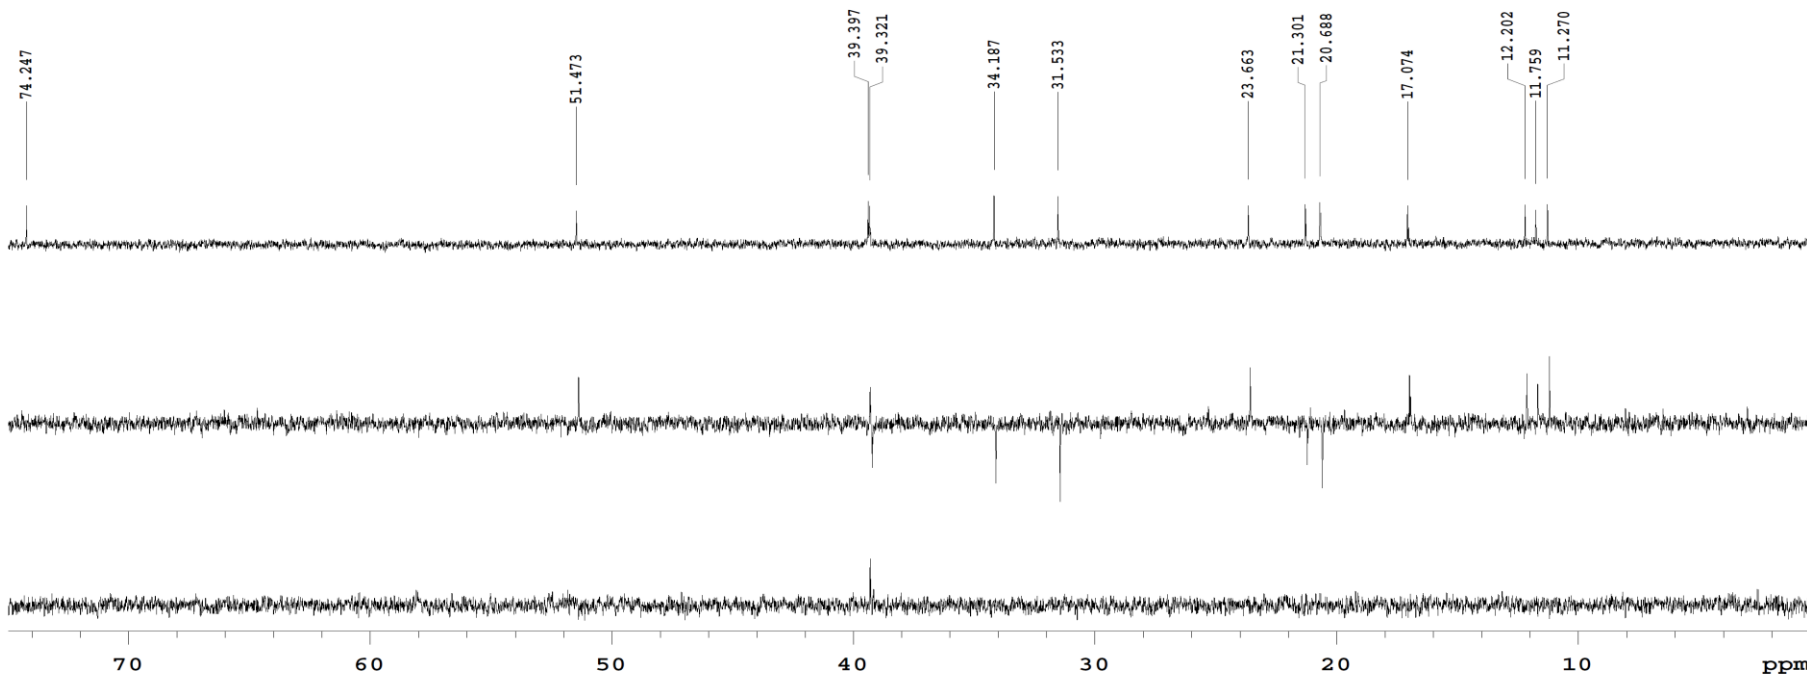

Figure S7: DEPT spectrum of 1

Sarco-Fr-3-25

Sample Name:  
Sarco-Fr-3-25  
Data Collected on:  
Varian-NMR-vnmrs400  
Archive directory:  
/home/sheu/vnmrsys/data  
Sample directory:  
Sarco-Fr-3-25\_20180405\_01  
FidFile: HSQCAD\_01

Pulse Sequence: HSQCAD  
Solvent: cdcl3  
Data collected on: Apr 5 2018

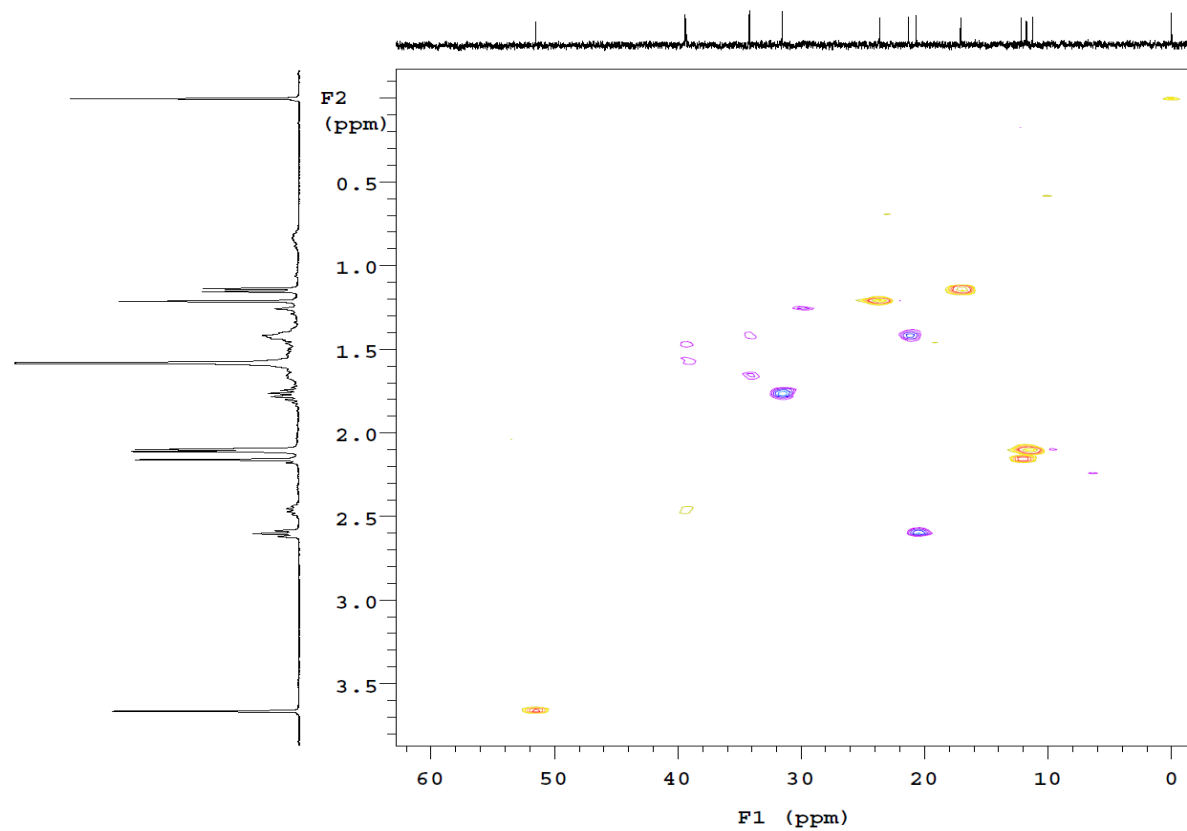

Figure S8: HSQC spectrum of 1



Sarco-Fr-3-25

Sample Name:  
Sarco-Fr-3-25  
Data Collected on:  
Varian-NMR-vnmrs400  
Archive directory:  
/home/sheu/vnmrsys/data  
Sample directory:  
Sarco-Fr-3-25\_20180405\_01  
FidFile: gCOSY\_01

Pulse Sequence: gCOSY  
Solvent: cdcl3  
Data collected on: Apr 5 2018

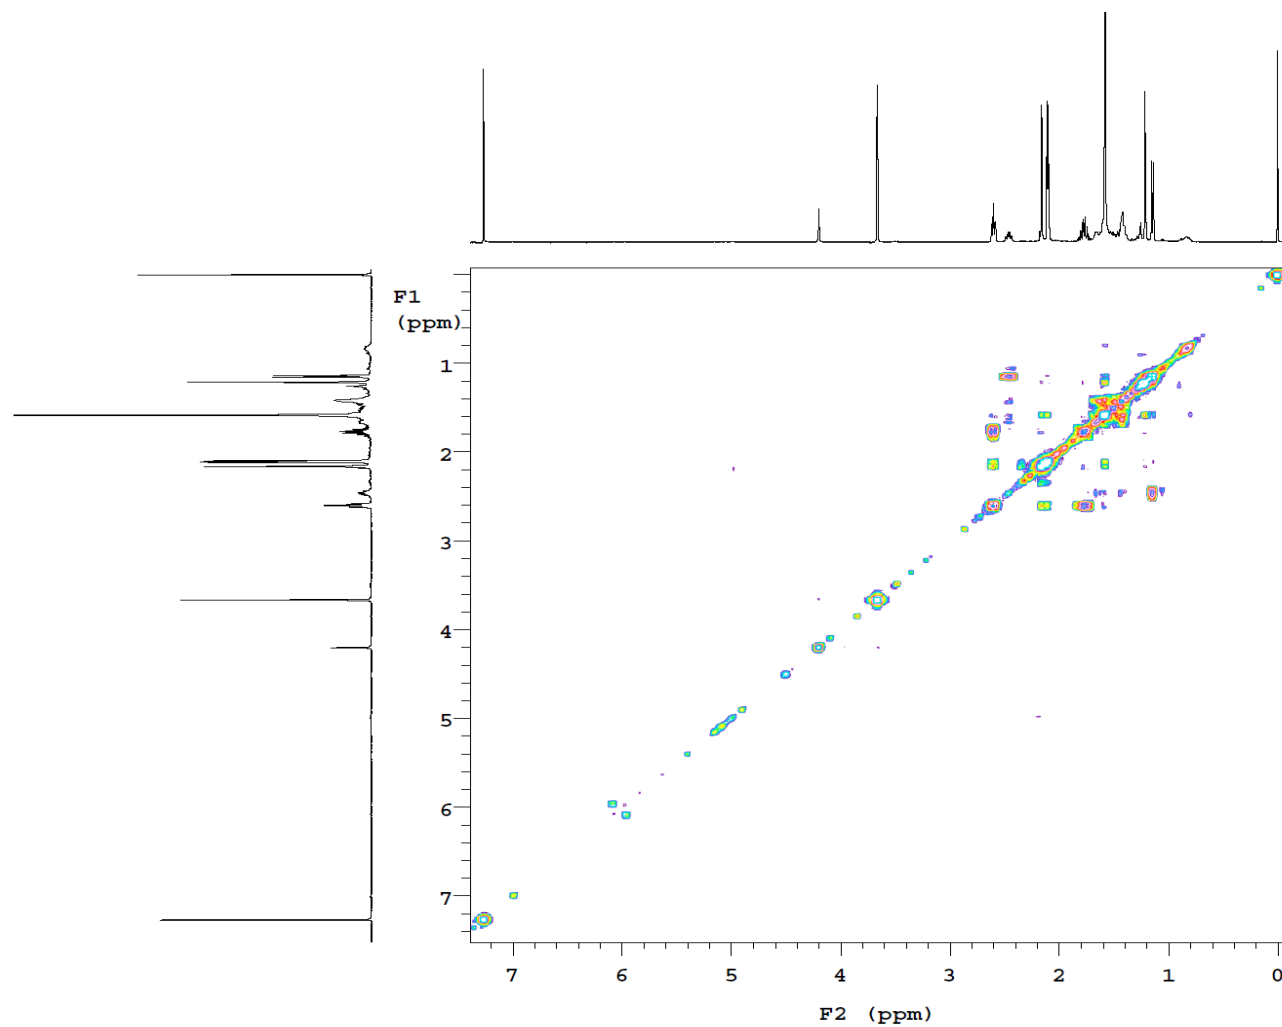

Figure S9: COSY spectrum of 1

Sarco-Fr-3-25

Sample Name:  
Sarco-Fr-3-25  
Data Collected on:  
Varian-NMR-vnmrs400  
Archive directory:  
/home/sheu/vnmrsys/data  
Sample directory:  
Sarco-Fr-3-25\_20180405\_01  
FidFile: gHMBCAD\_01

Pulse Sequence: gHMBCAD  
Solvent: cdcl3  
Data collected on: Apr 6 2018

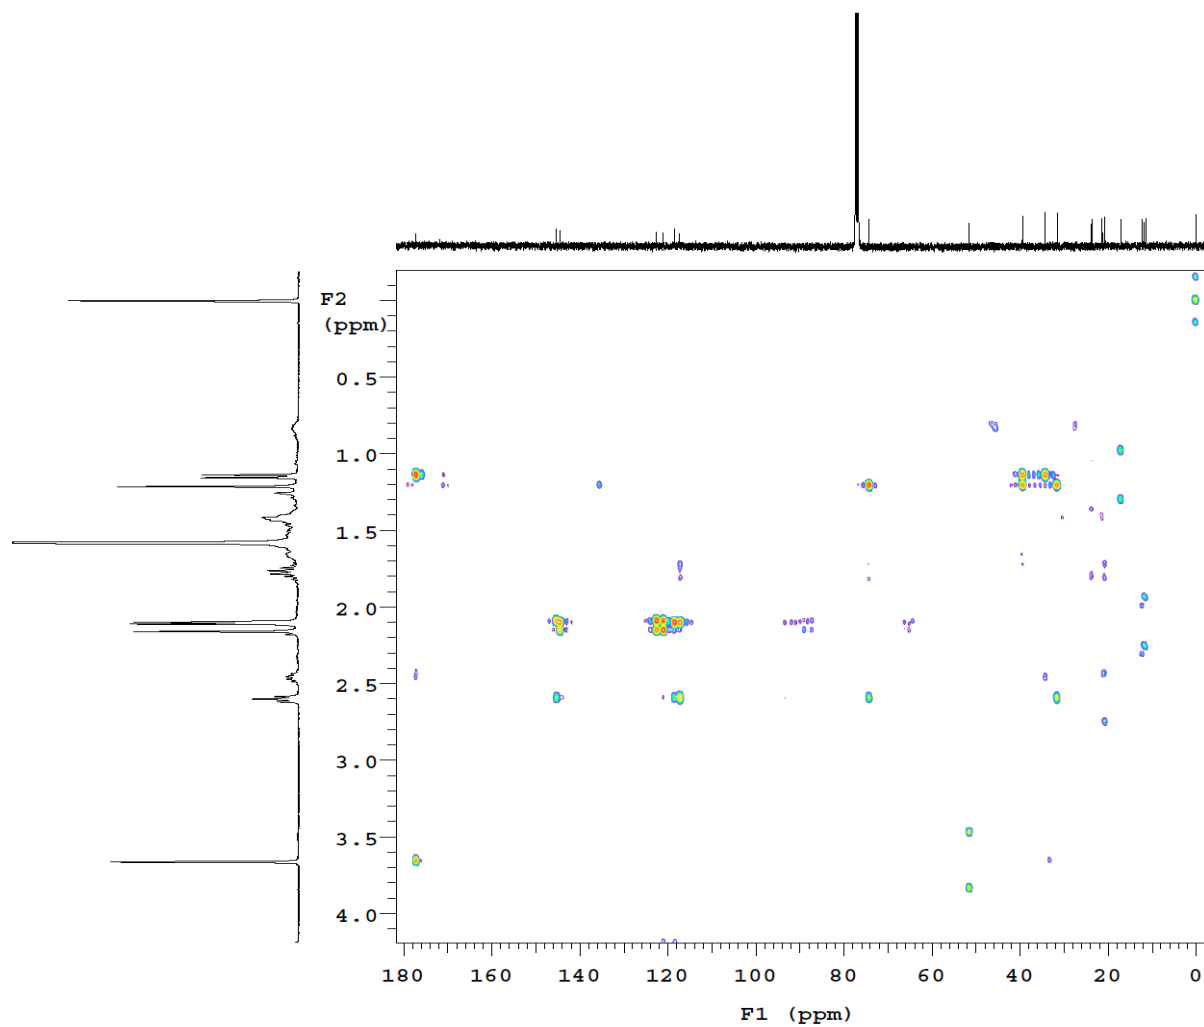

Figure S10: HMBC spectrum of 1

Sarco-Fr-3-25

Sample Name:  
Sarco-Fr-3-25  
Data Collected on:  
Varian-NMR-vnmrs400  
Archive directory:  
/home/sheu/vnmrsys/data  
Sample directory:  
Sarco-Fr-3-25\_20180405\_01  
FidFile: NOESY\_01

Pulse Sequence: NOESY  
Solvent: cdcl3  
Data collected on: Apr 6 2018

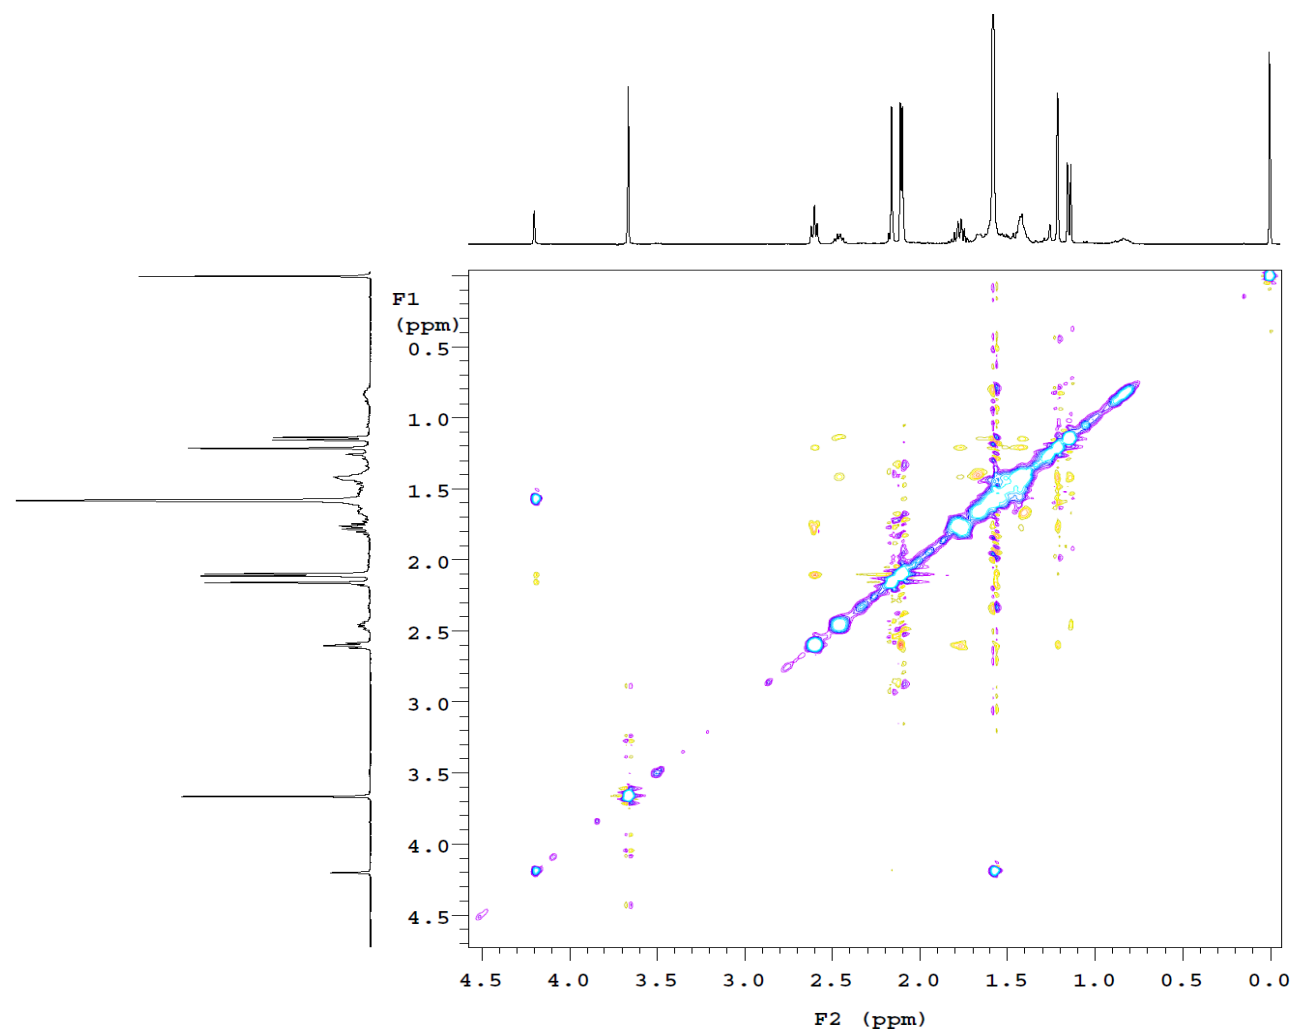

Figure S11: NOESY spectrum of 1

## Compound 2 spectroscopic data

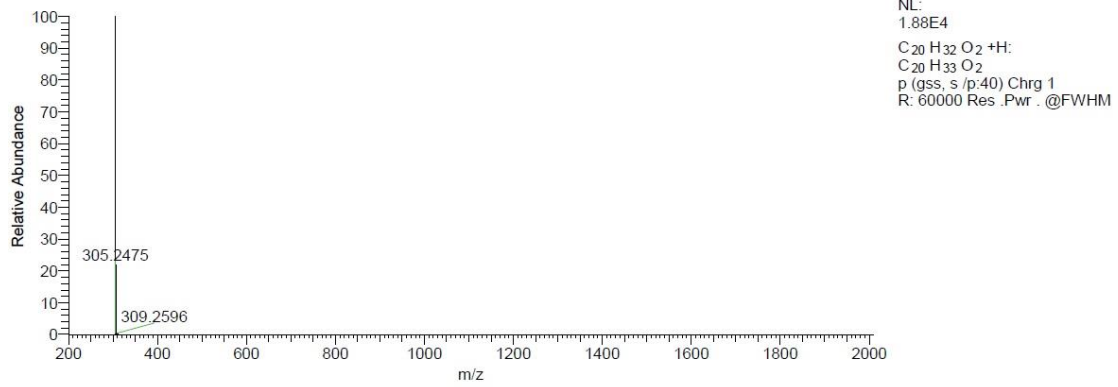

Figure S12: ESIMS spectrum of 2

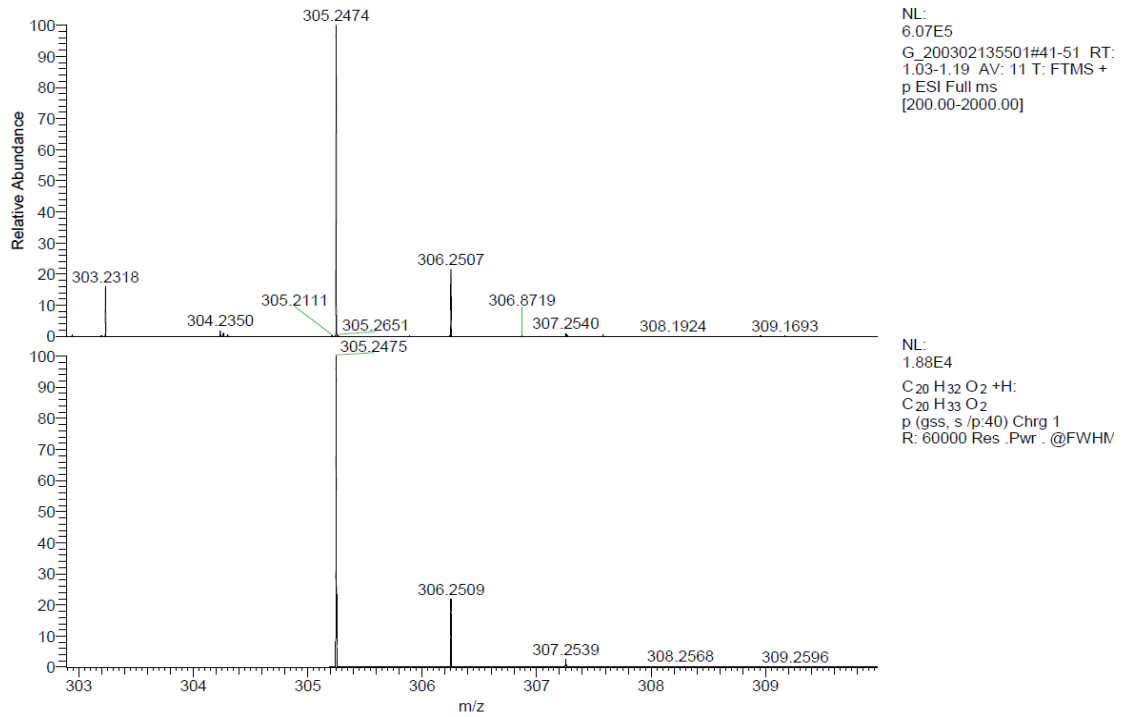

Figure S13: HRESIMS spectrum of 2

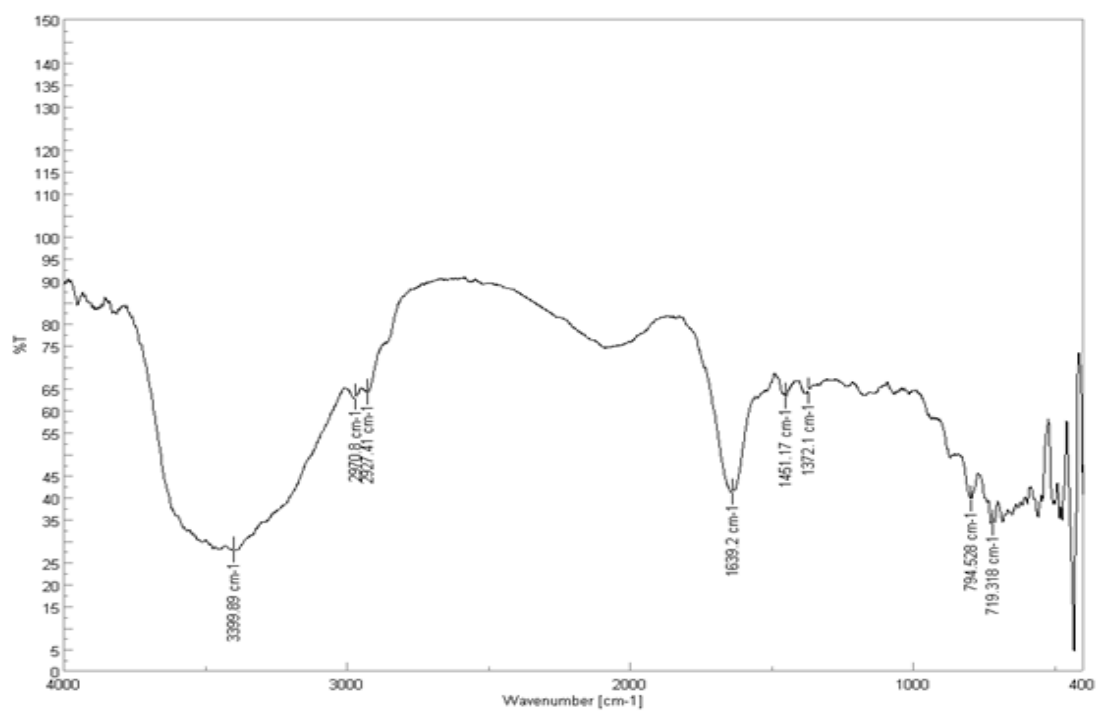

Figure S14: IR spectrum of 2

Sarco-Fr-2-(27-33)-30

Sample Name:

Sarco-Fr-2-27-33-30

Data Collected on:

Varian-NMR-vnmrs400

Archive directory:

/home/sheu/vnmrsys/data

Sample directory:

Sarco-Fr-2-27-33-30\_20180311\_01

FidFile: PROTON\_02

Pulse Sequence: PROTON (s2pul)

Solvent: cdcl3

Data collected on: Mar 11 2018

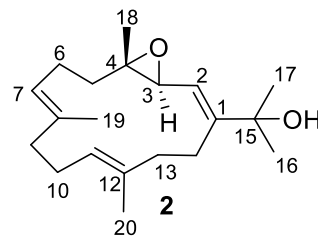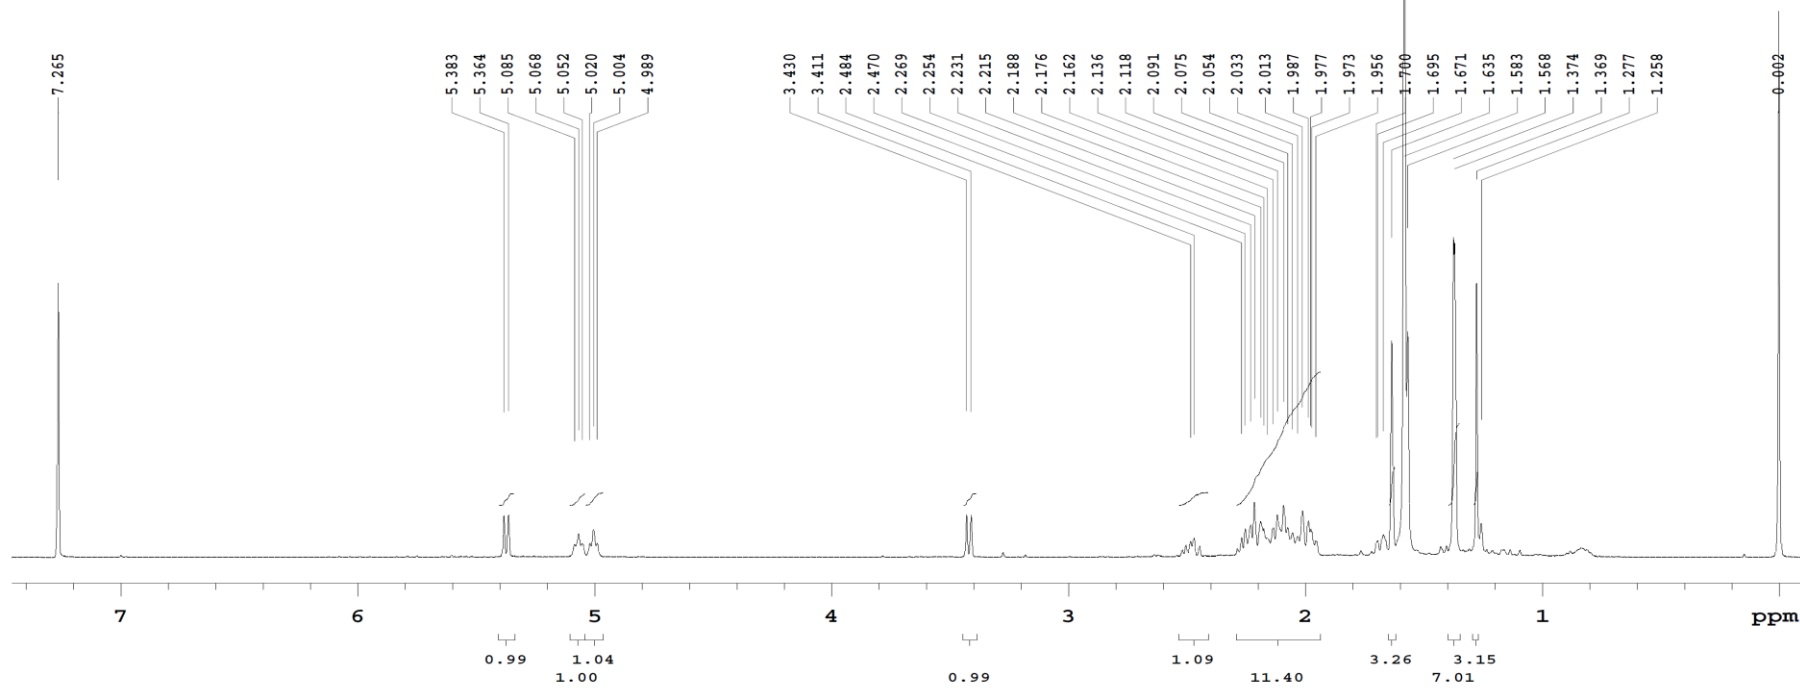

Figure S15: <sup>1</sup>H NMR spectrum of 2 in CDCl<sub>3</sub> at 400 MHz

Sarco-Fr-2- (27-33) -30

Sample Name:

Sarco-Fr-2-\_27-33\_-30

Data Collected on:

Varian-NMR-vnmrs400

Archive directory:

/home/sheu/vnmrsys/data

Sample directory:

Sarco-Fr-2-\_27-33\_-30\_20180311\_01

FidFile: PROTON\_02

Pulse Sequence: PROTON (s2pul)

Solvent: cdcl3

Data collected on: Mar 11 2018

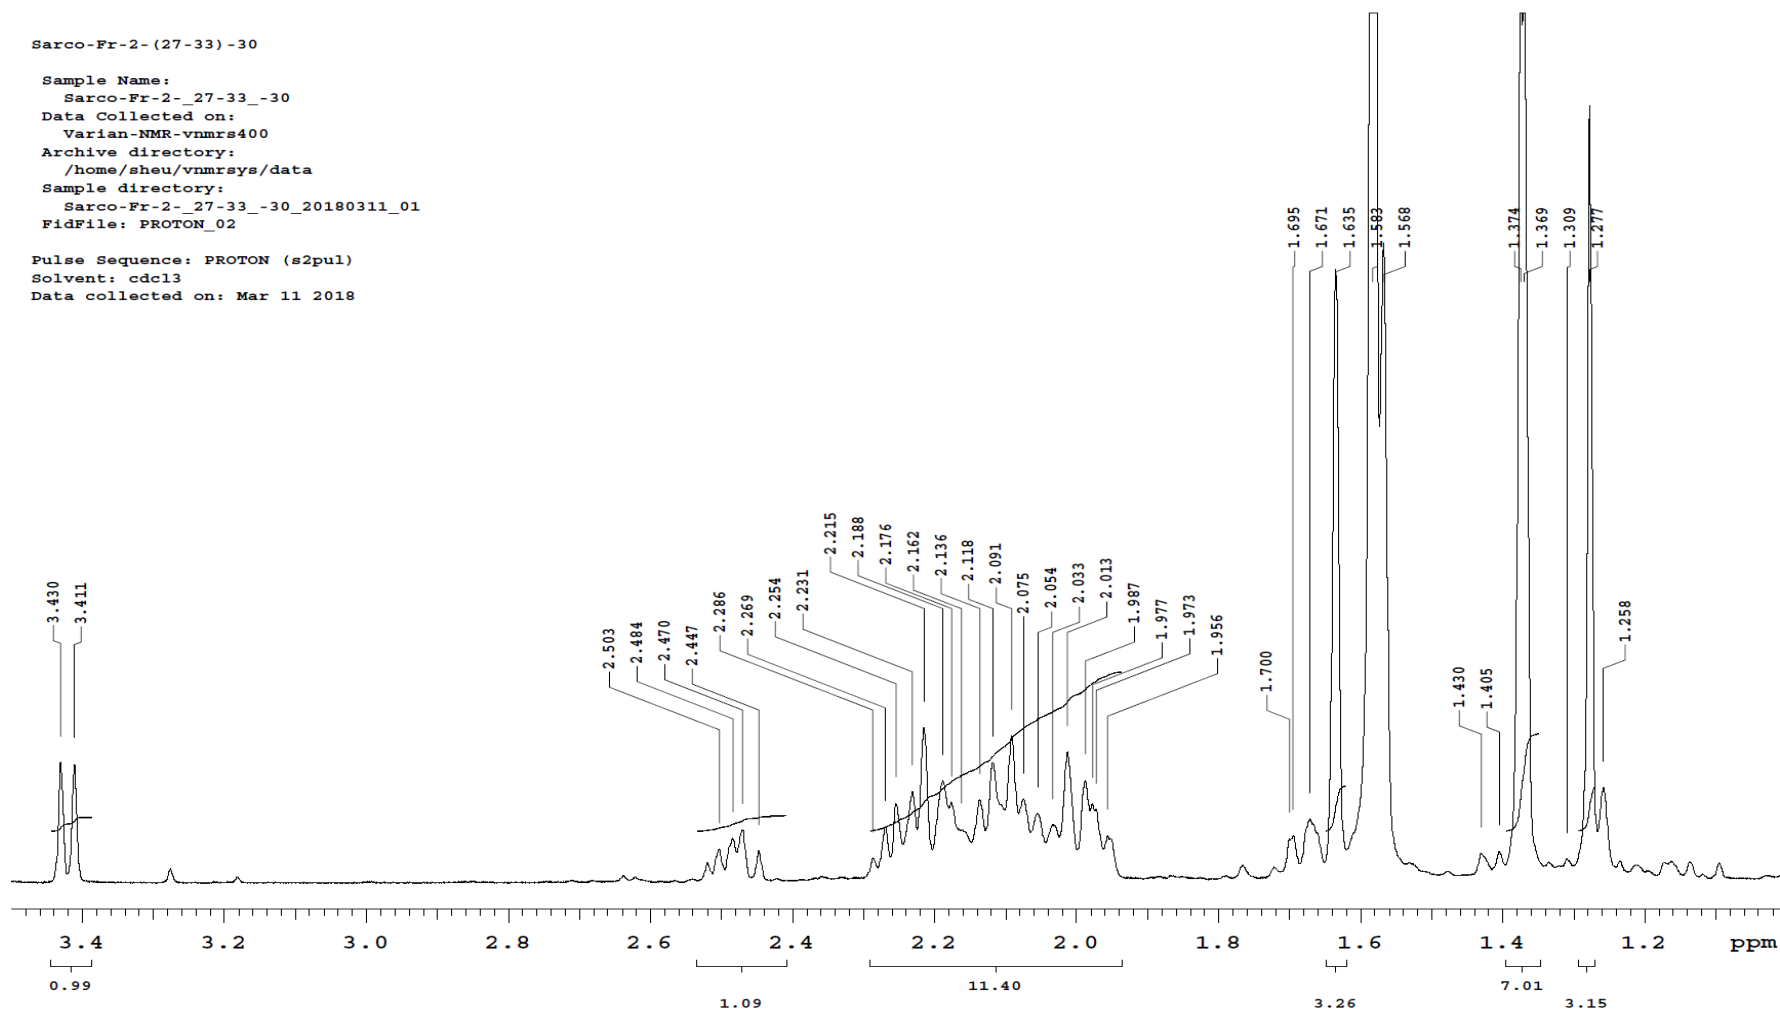

Figure S16: <sup>1</sup>H NMR spectrum (from 1.0 to 3.5 ppm) of 2 in CDCl<sub>3</sub> at 400 MHz

Sarco-Fr-2-(27-33)-30

Sample Name:  
Sarco-Fr-2\_27-33\_30  
Data Collected on:  
Varian-NMR-vnmrs400  
Archive directory:  
/home/sheu/vnmrsys/data  
Sample directory:  
Sarco-Fr-2\_27-33\_30\_20180311\_01  
FidFile: CARBON\_01

Pulse Sequence: CARBON (s2pul)  
Solvent: cdcl3  
Data collected on: Mar 11 2018

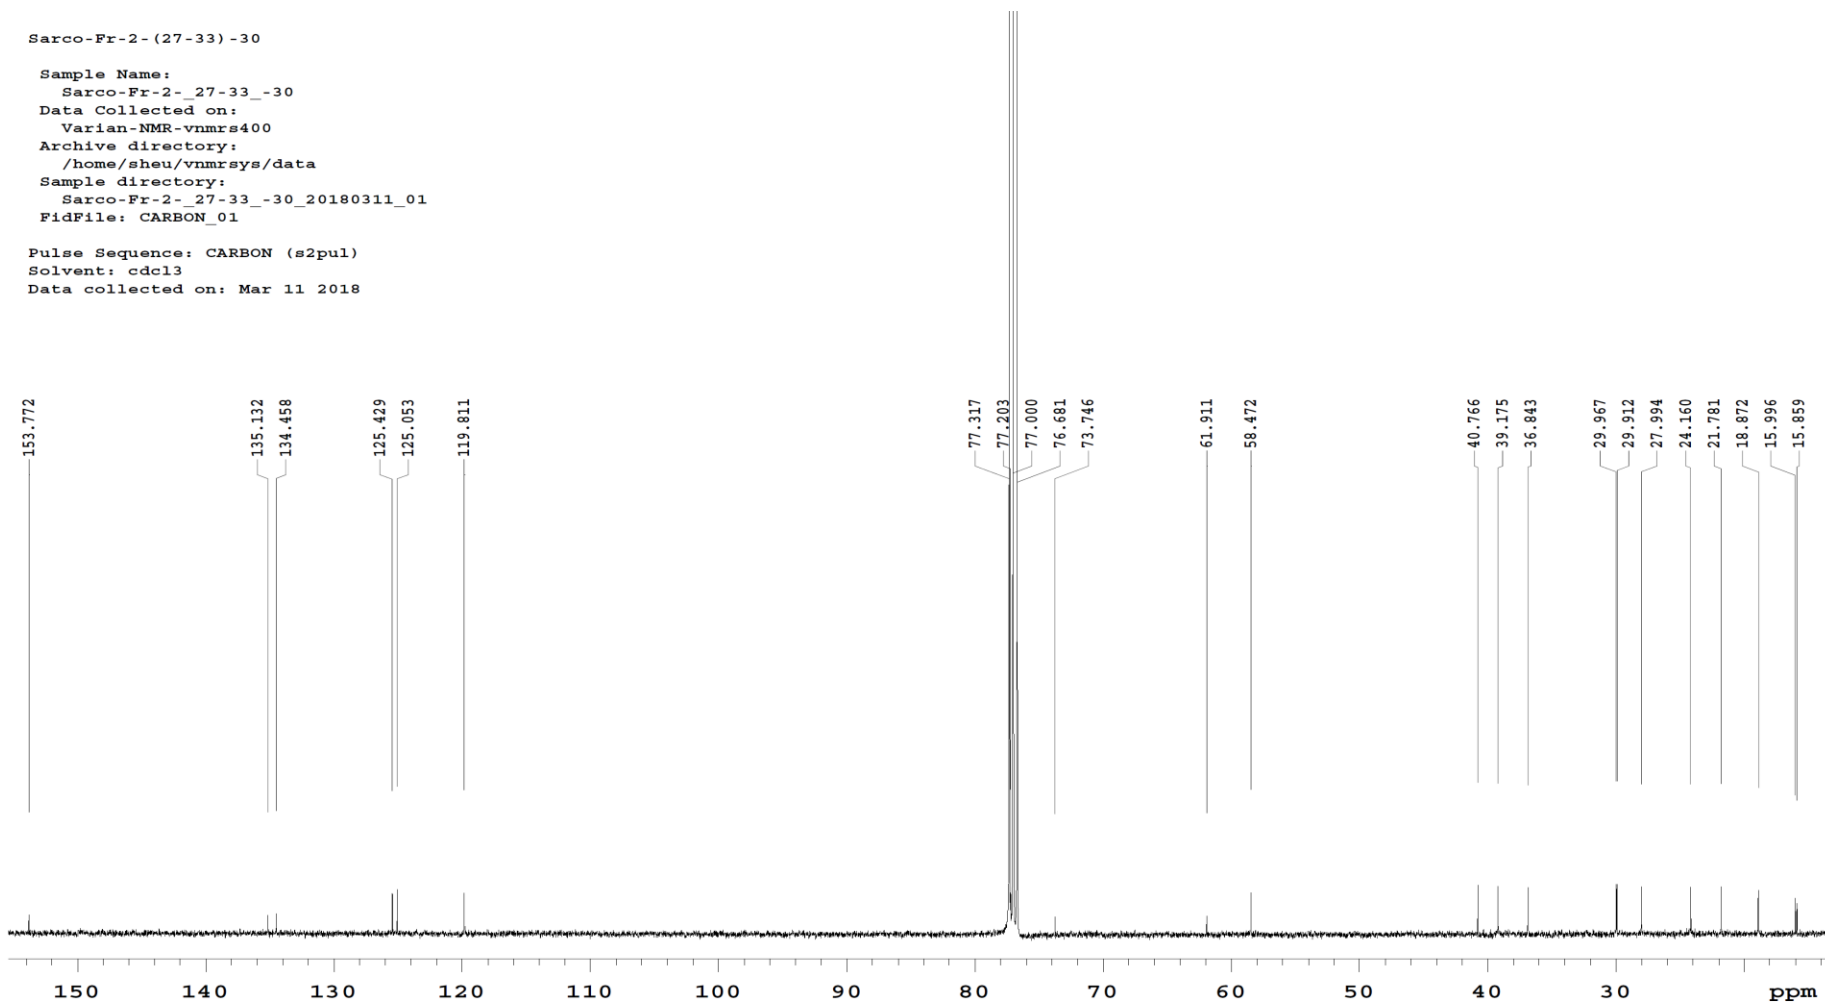

Figure S17:  $^{13}\text{C}$  NMR spectrum of **2** in  $\text{CDCl}_3$  at 100 MHz



Sarco-Fr-2-(27-33)-30

Sample Name:

Sarco-Fr-2-\_27-33\_-30

Data Collected on:

Varian-NMR-vnmrs400

Archive directory:

/home/sheu/vnmrsys/data

Sample directory:

Sarco-Fr-2-\_27-33\_-30\_20180311\_01

FidFile: DEPT\_01

Pulse Sequence: DEPT

Solvent: cdcl3

Data collected on: Mar 11 2018

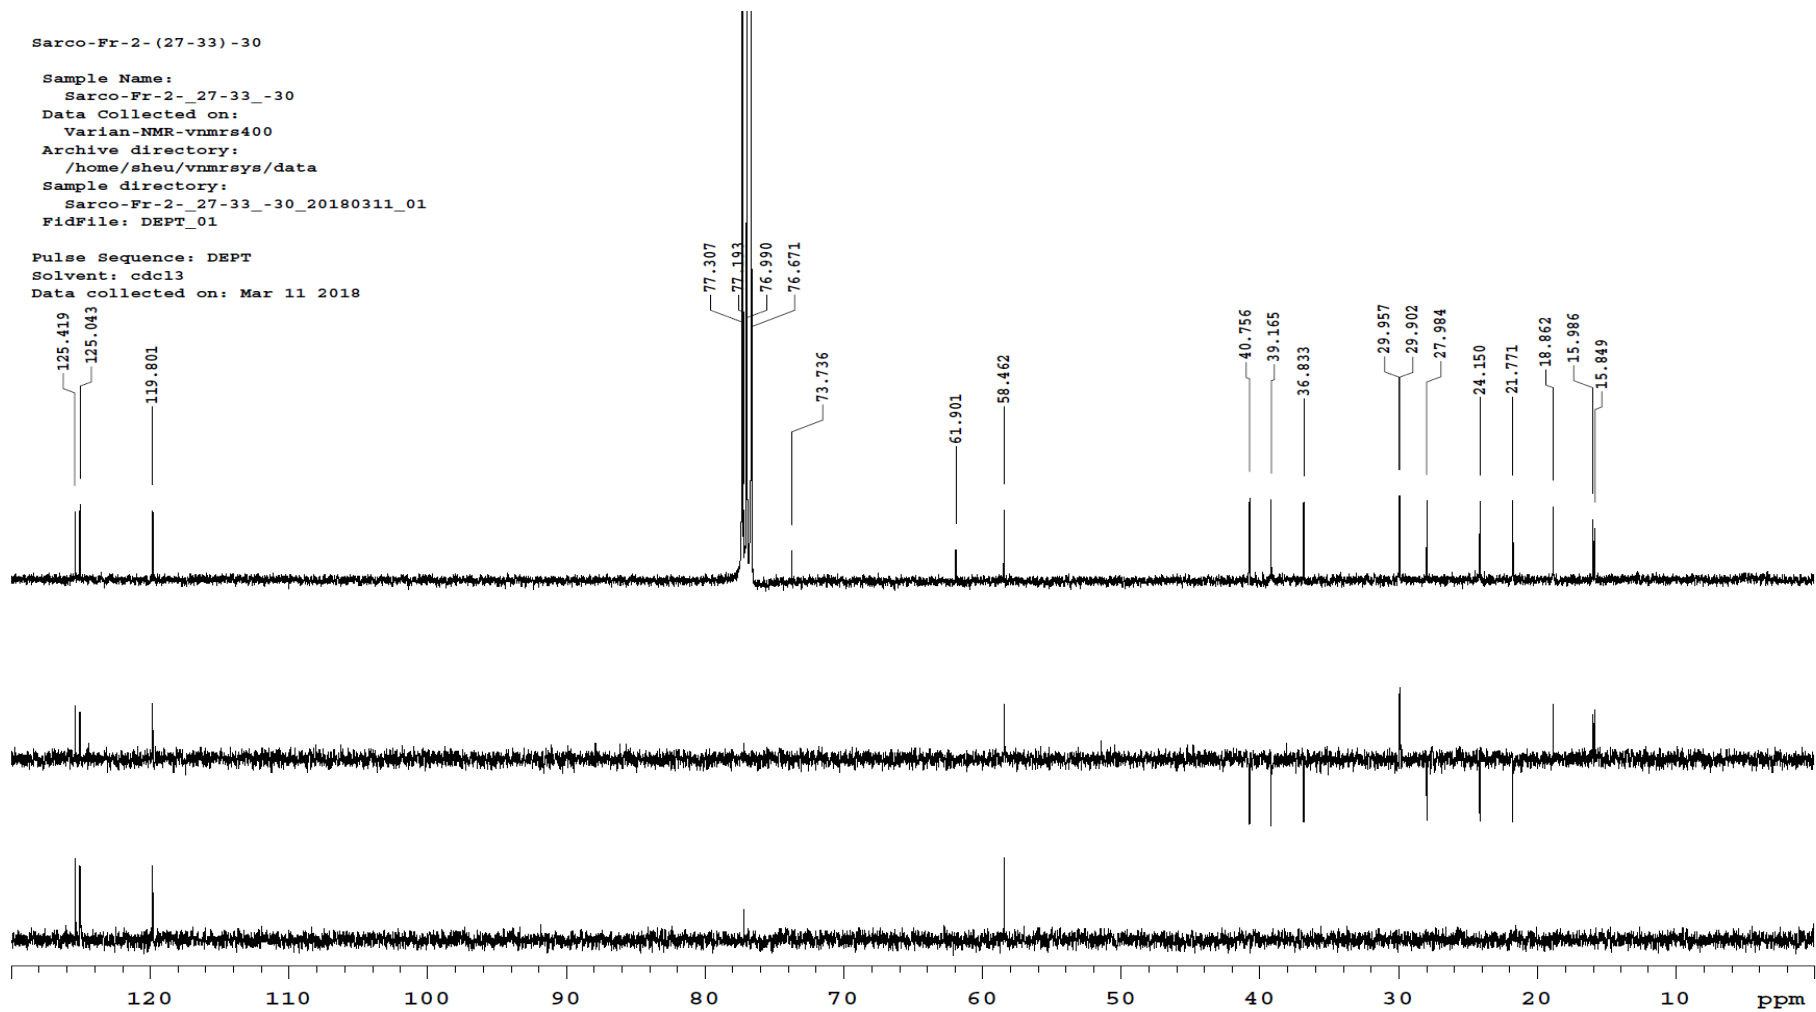

Figure S16: DEPT spectrum of 2

Sarco-Fr-2- (27-33) -30

Sample Name:  
Sarco-Fr-2\_27-33\_-30  
Data Collected on:  
Varian-NMR-vnmrs400  
Archive directory:  
/home/sheu/vnmrsys/data  
Sample directory:  
Sarco-Fr-2\_27-33\_-30\_20180311\_01  
FidFile: HSQCAD\_01

Pulse Sequence: HSQCAD  
Solvent: cdcl3  
Data collected on: Mar 11 2018

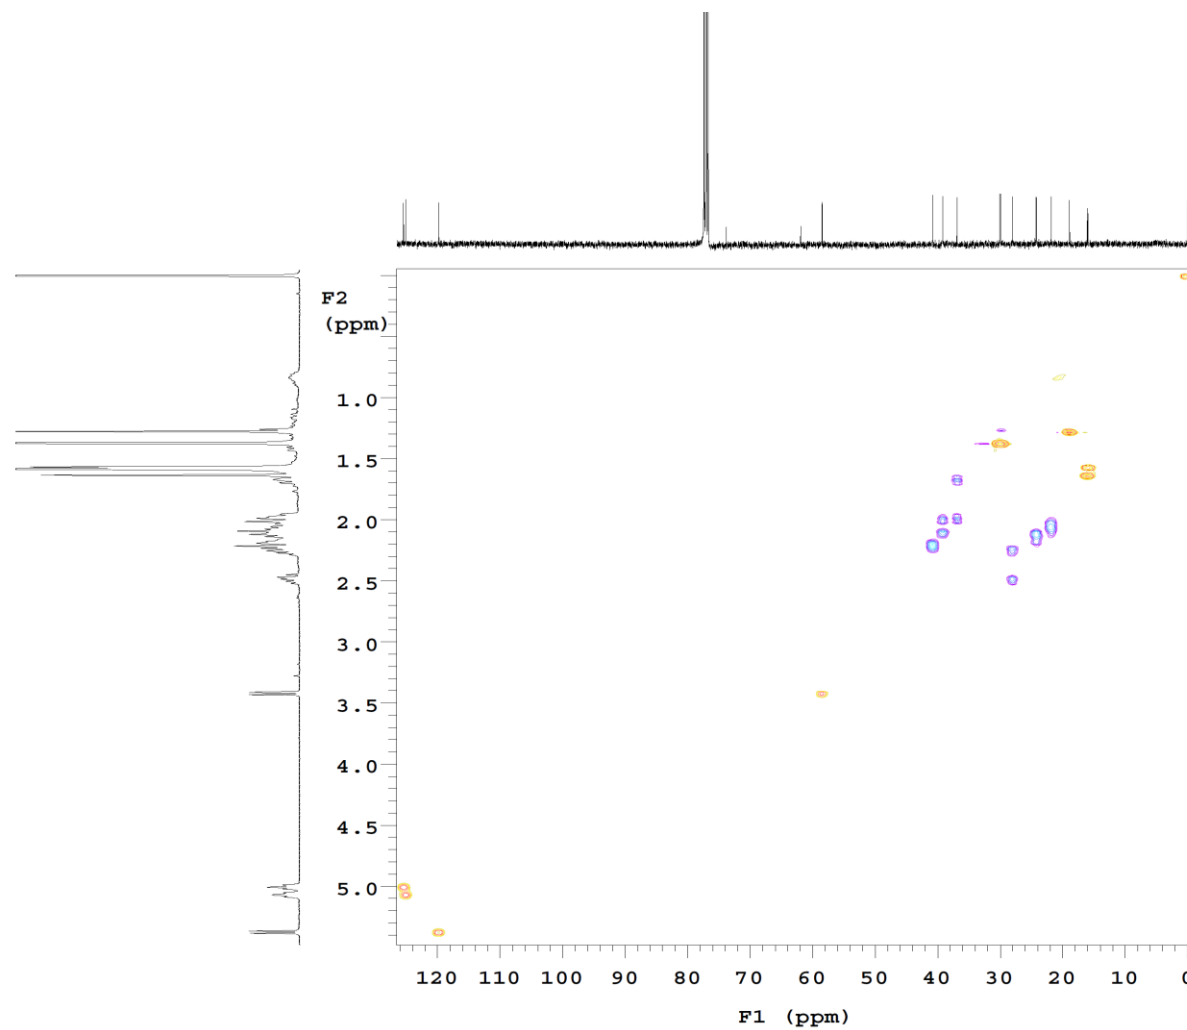

Figure S19: HSQC spectrum of 2

Sarco-Fr-2-(27-33)-30

Sample Name:  
Sarco-Fr-2\_27-33\_30  
Data Collected on:  
Varian-NMR-vnmrs400  
Archive directory:  
/home/sheu/vnmrsys/data  
Sample directory:  
Sarco-Fr-2\_27-33\_30\_20180311\_01  
FidFile: gCOSY\_01

Pulse Sequence: gCOSY  
Solvent: cdcl3  
Data collected on: Mar 12 2018

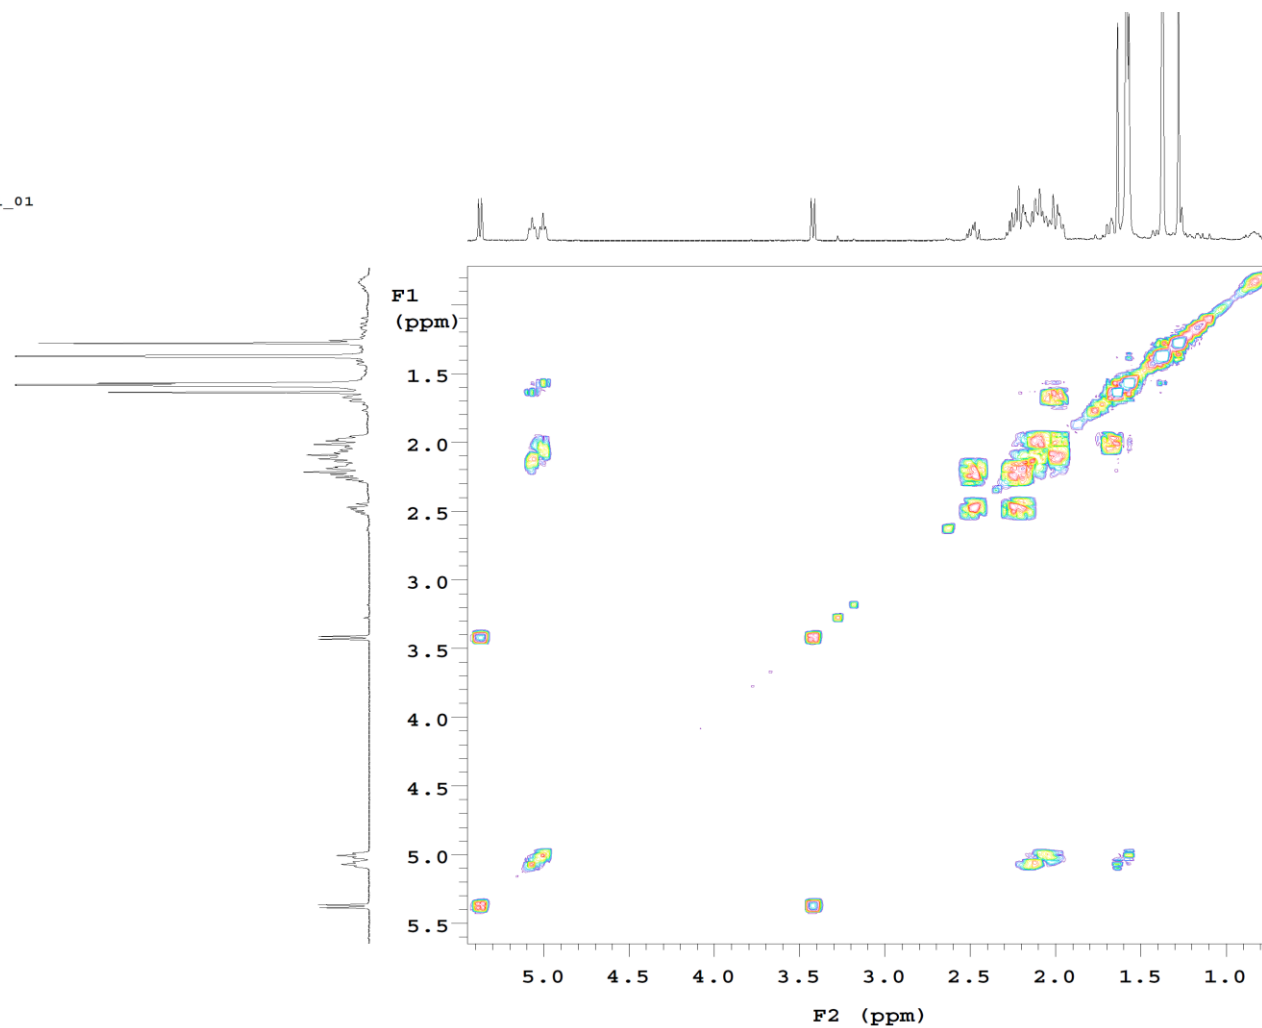

Figure S20: COSY spectrum of 2

Sarco-Fr-2-(27-33)-30

Sample Name:  
Sarco-Fr-2-27-33-30  
Data Collected on:  
Varian-NMR-vnmrs400  
Archive directory:  
/home/sheu/vnmrsys/data  
Sample directory:  
Sarco-Fr-2-27-33-30\_20180311\_01  
FidFile: gHMBCAD\_01

Pulse Sequence: gHMBCAD  
Solvent: cdcl3  
Data collected on: Mar 12 2018

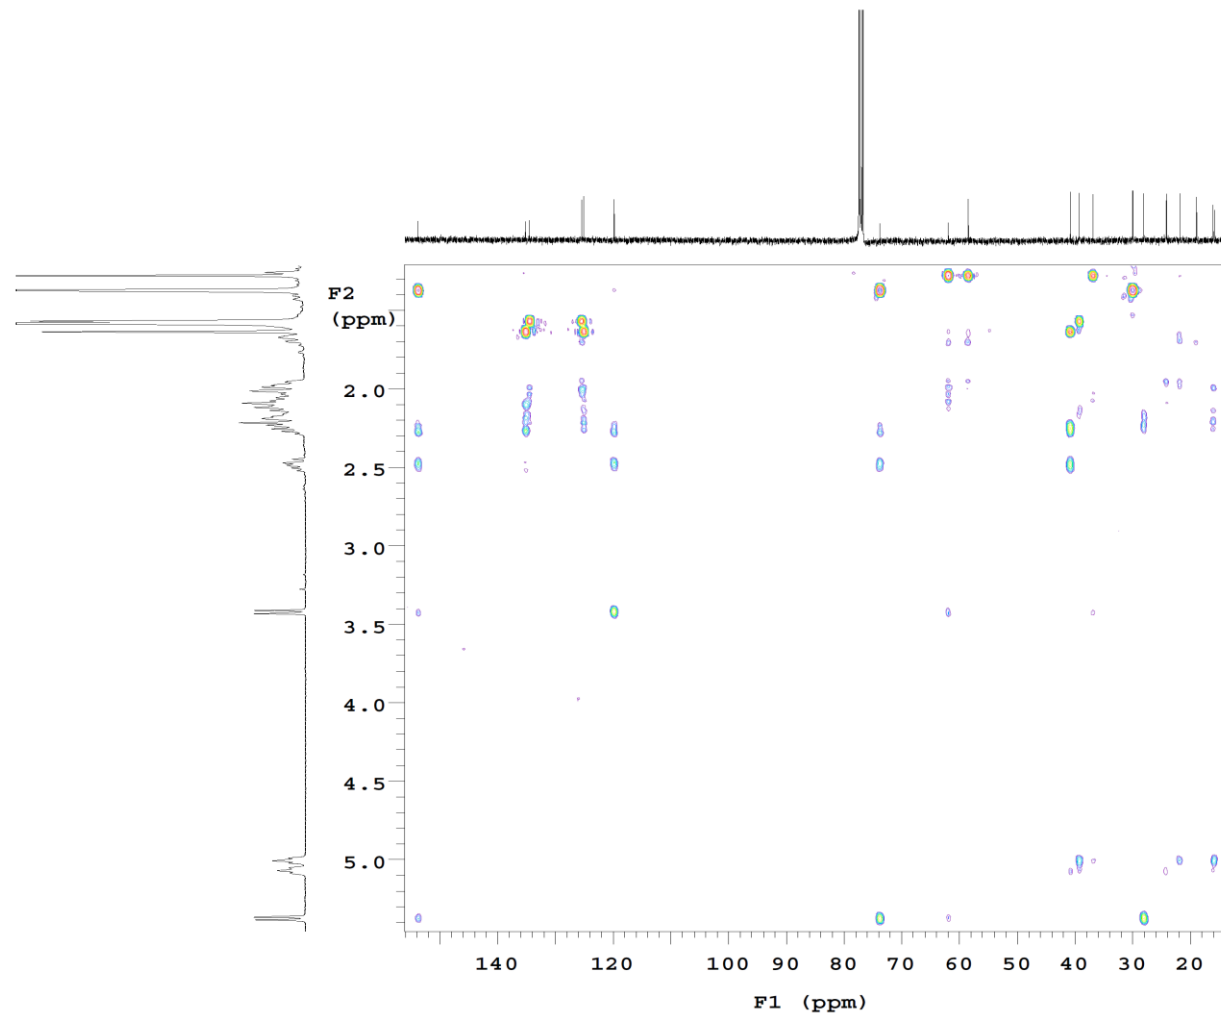

Figure S21: HMBC spectrum of 2

Sarco-Fr-2-(27-33)-30

Sample Name:  
Sarco-Fr-2-\_27-33\_-30  
Data Collected on:  
Varian-NMR-vnmrs400  
Archive directory:  
/home/sheu/vnmrsys/data  
Sample directory:  
Sarco-Fr-2-\_27-33\_-30\_20180311\_01  
FidFile: NOESY\_01

Pulse Sequence: NOESY  
Solvent: cdcl3  
Data collected on: Mar 12 2018

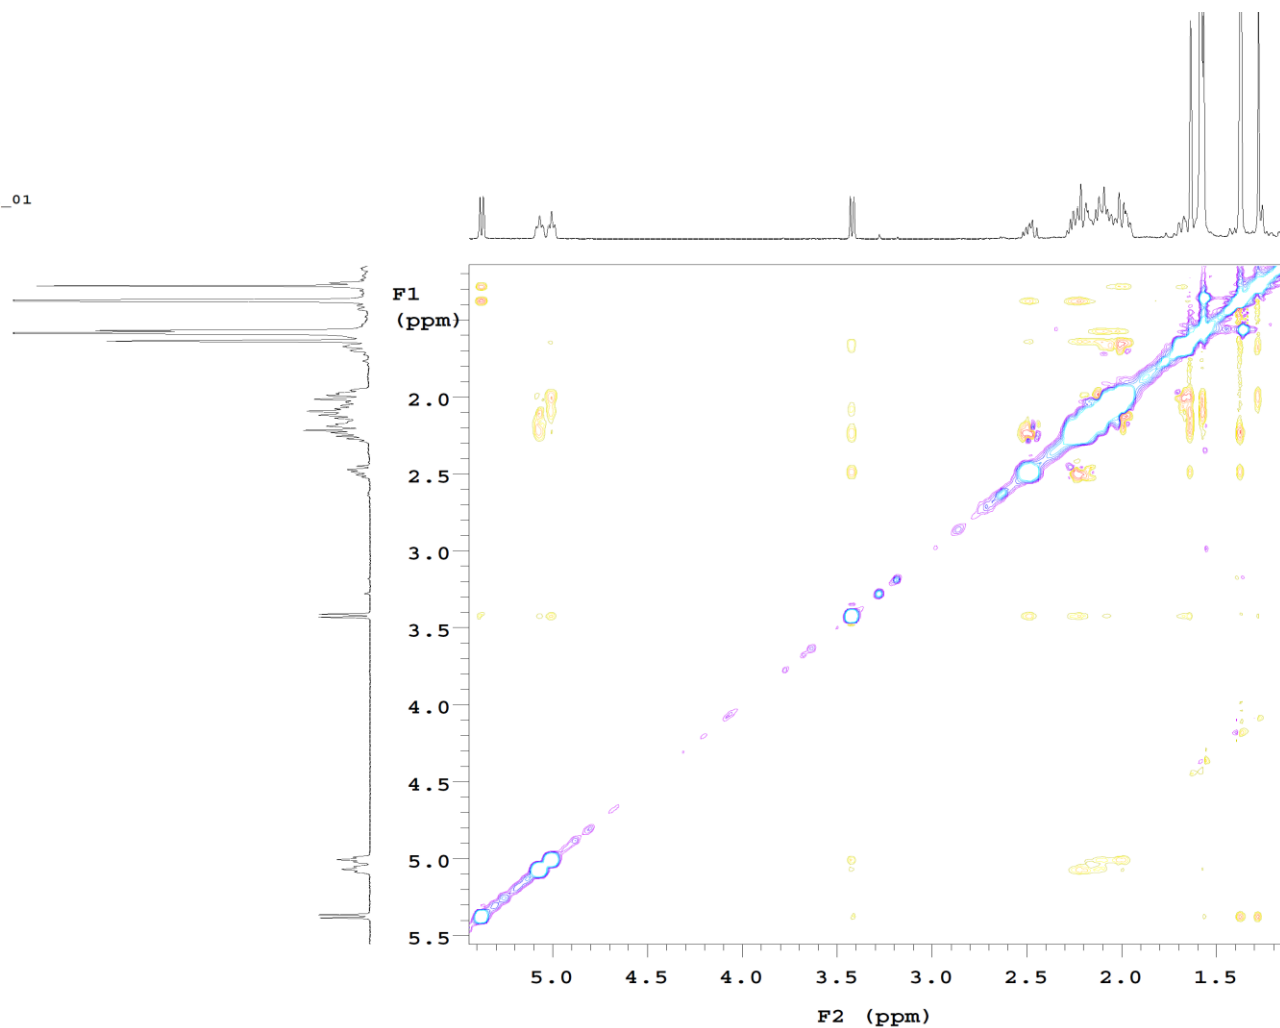

Figure S22: NOESY spectrum of 2

# Compound 3 spectroscopic data

## FT-MS

### Analysis Info

Analysis Name D:\Data\1\SARCOFR24019\_000003.d  
Method broadband first signal  
Sample Name Sarco-fr-2-40-27  
Comment ESI Positive

2/27/2018 2:17:51 PM

Instrument: FT-MS solariX

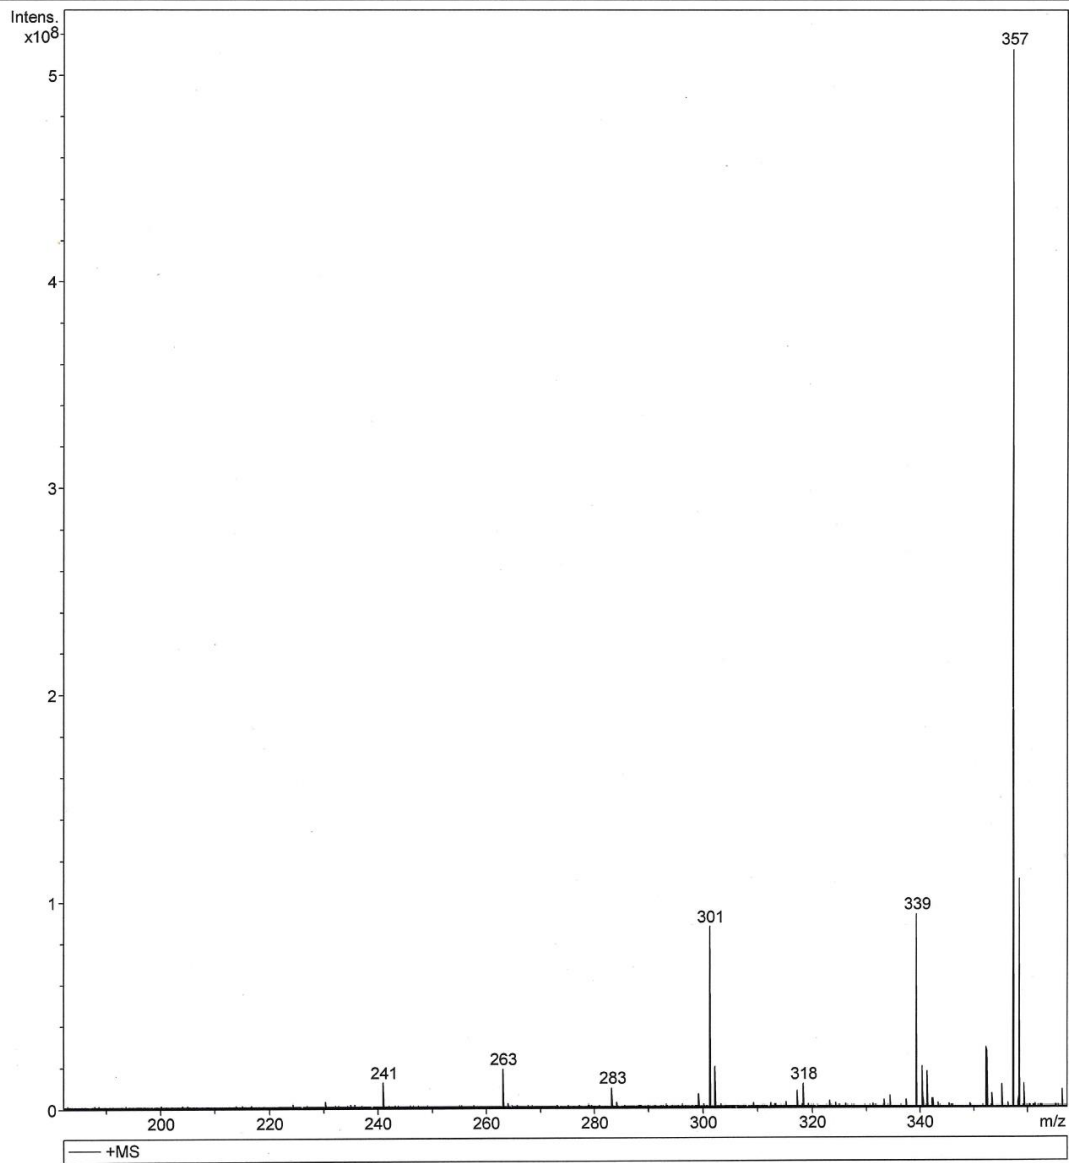

Figure 23: ESIMS spectrum of 3

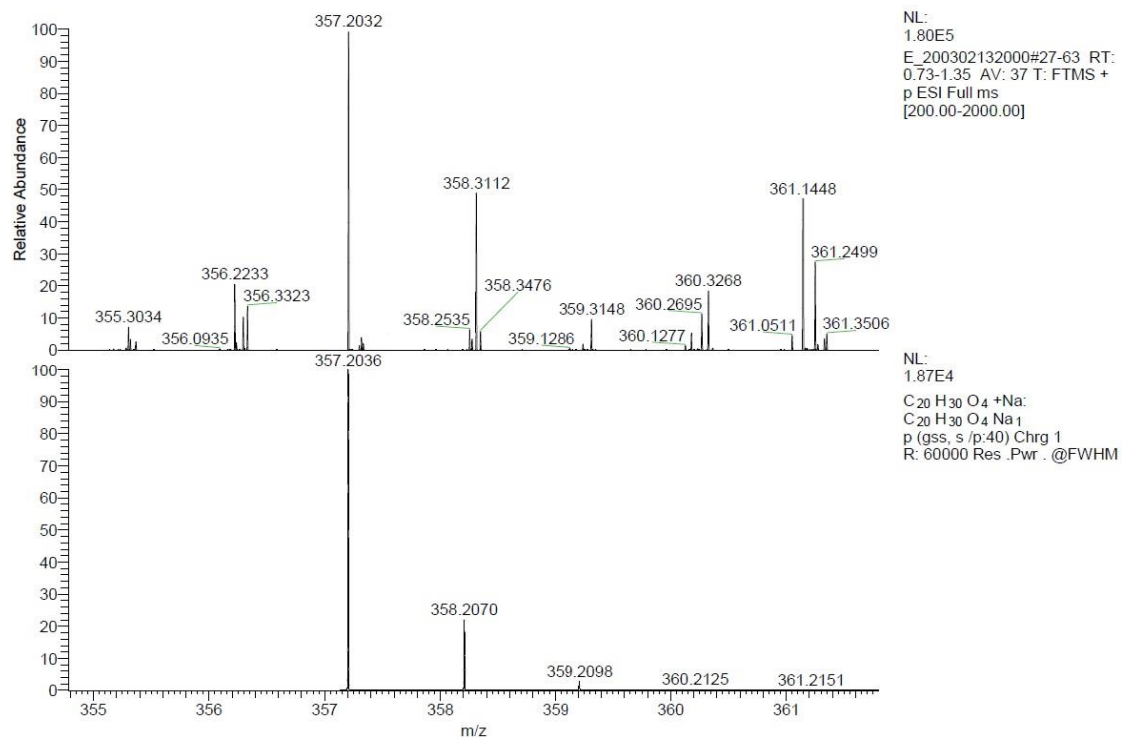

Figure S24: HRESIMS spectrum of 3

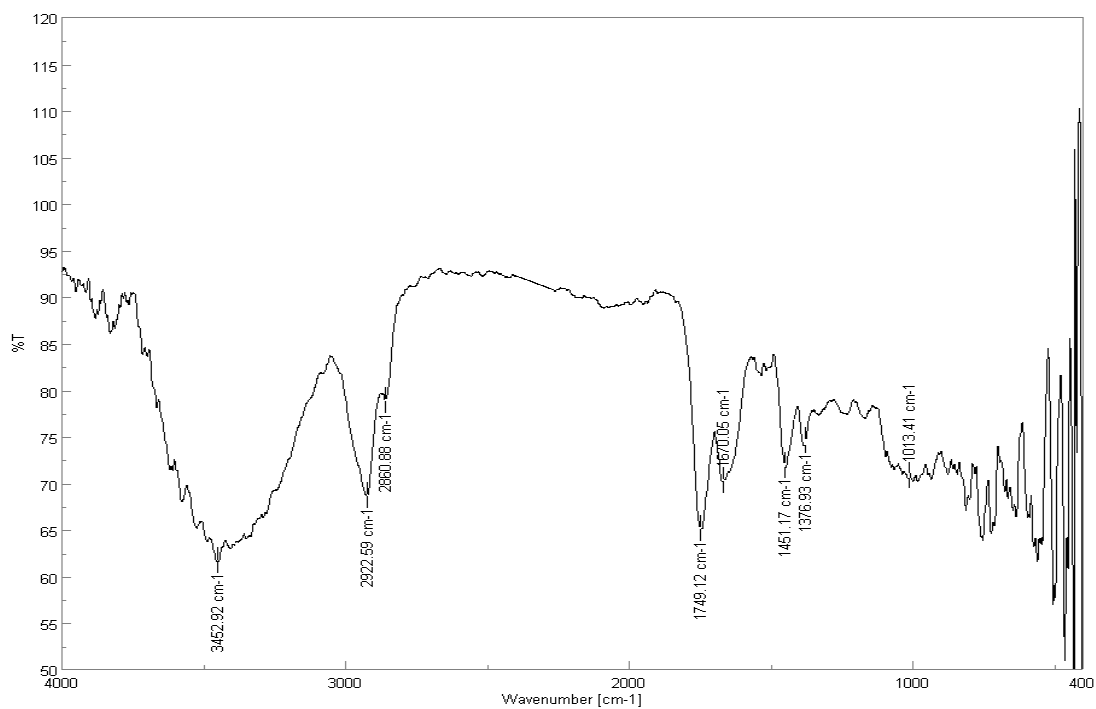

Figure S25: IR spectrum of 3

Sarco-fr-2-40-(17-19)-27

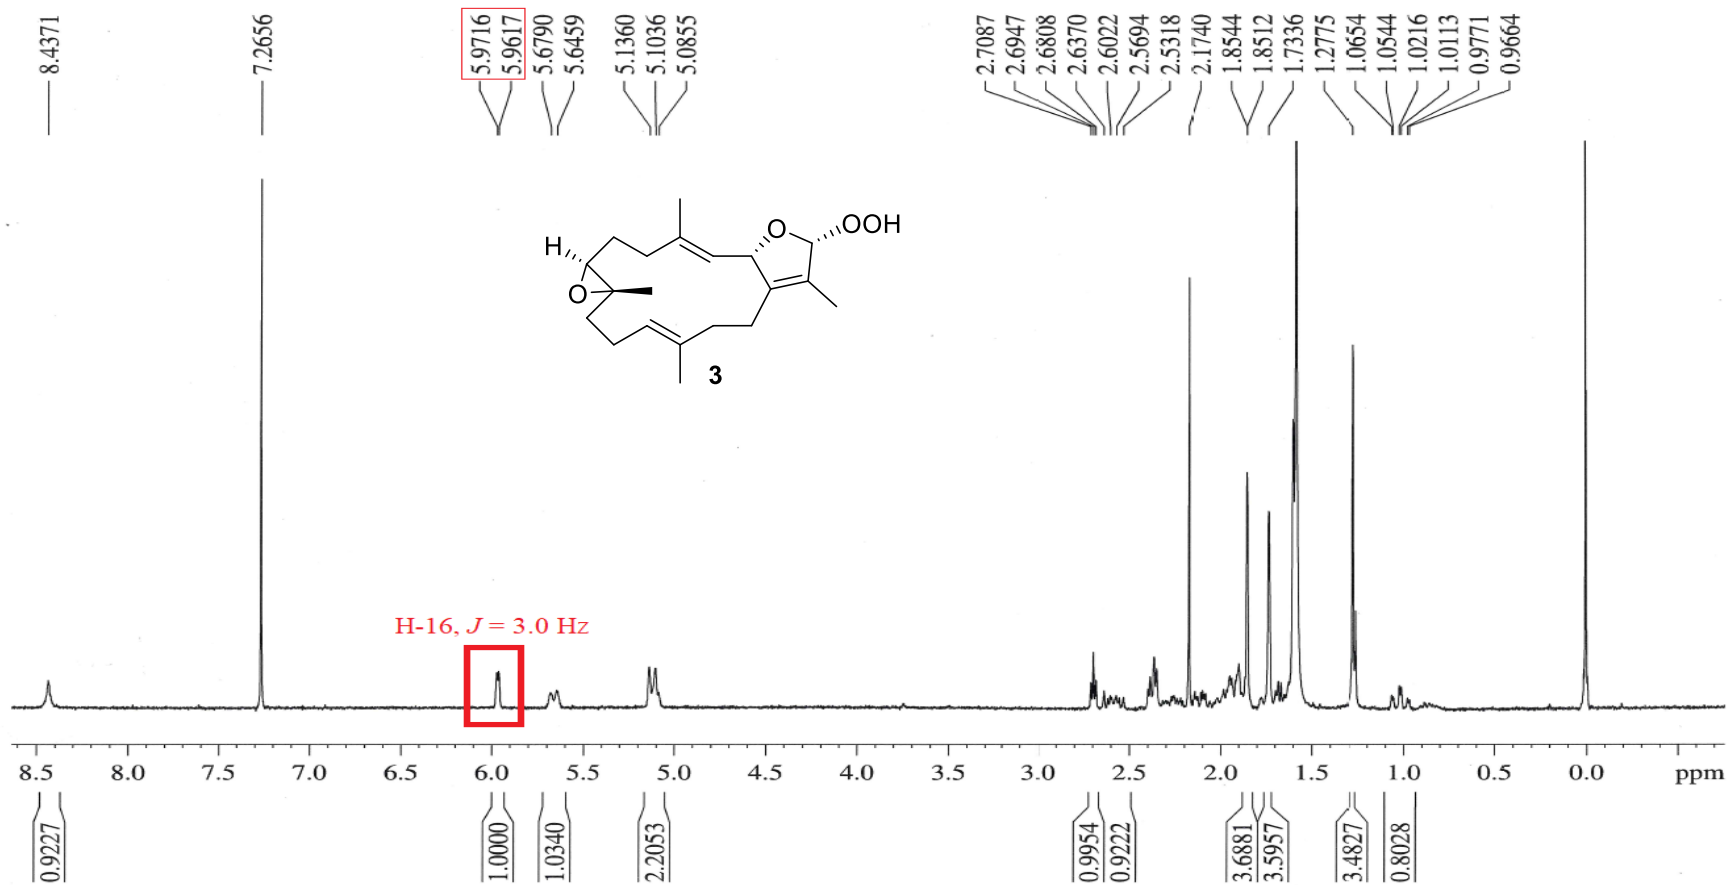

Figure S26:  $^1\text{H}$  NMR spectrum of 3 in  $\text{CDCl}_3$  at 300 MHz



Sarco-Fr-2-40-17-27

Sample Name:  
Sarco-Fr-2-40-17-27  
Data Collected on:  
Varian-NMR-vnmrs400  
Archive directory:  
/home/sheu/vnmrsys/data  
Sample directory:  
Sarco-Fr-2-40-17-27\_20180401\_01  
FidFile: PROTON\_02

Pulse Sequence: PROTON (s2pul)  
Solvent: cdcl3  
Data collected on: Apr 1 2018

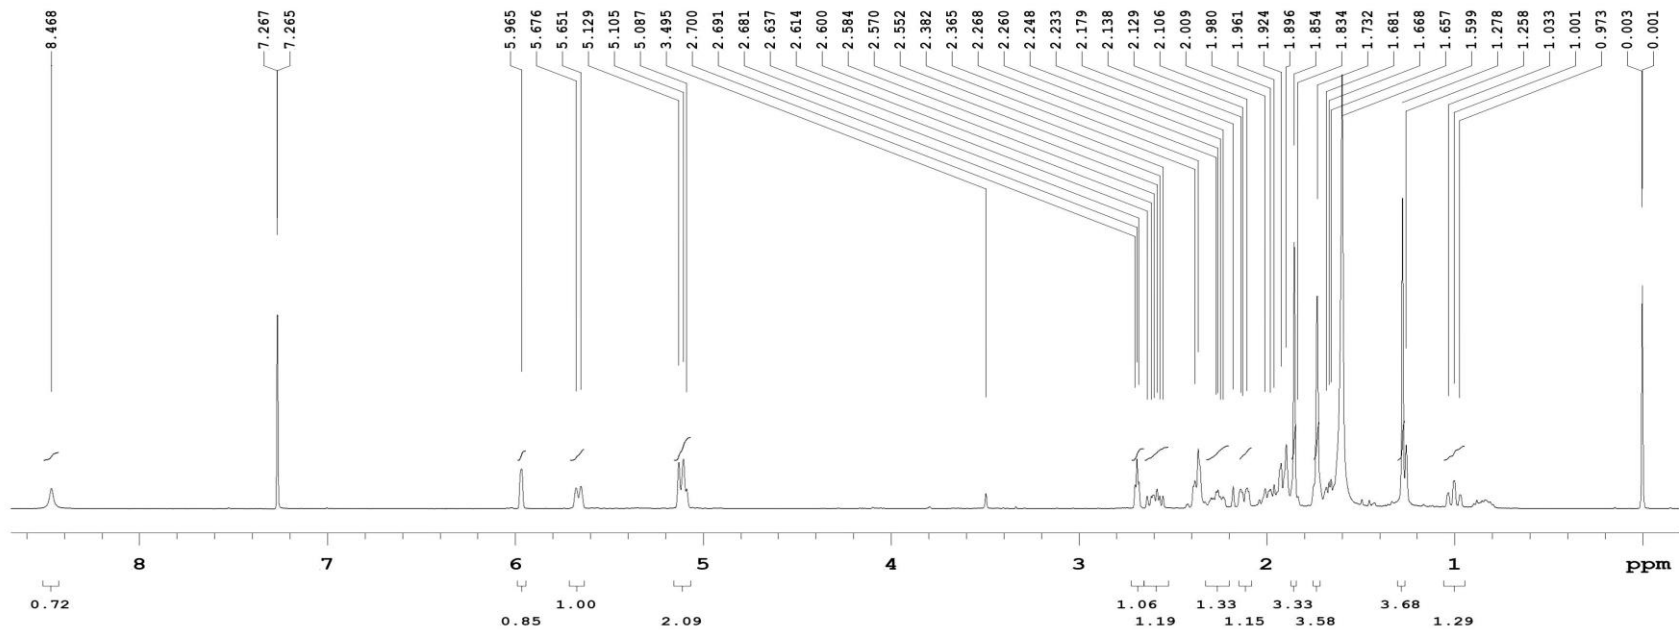

Figure S27:  $^1\text{H}$  NMR spectrum of **3** in  $\text{CDCl}_3$  at 400 MHz

Sarco-Fr-2-40-17-27

Sample Name:

Sarco-Fr-2-40-17-27

Data Collected on:

Varian-NMR-vmrms400

Archive directory:

/home/sheu/vnmrsys/data

Sample directory:

Sarco-Fr-2-40-17-27\_20180401\_01

FidFile: PROTON\_02

Pulse Sequence: PROTON (s2pul)

Solvent: cdcl3

Data collected on: Apr 1 2018

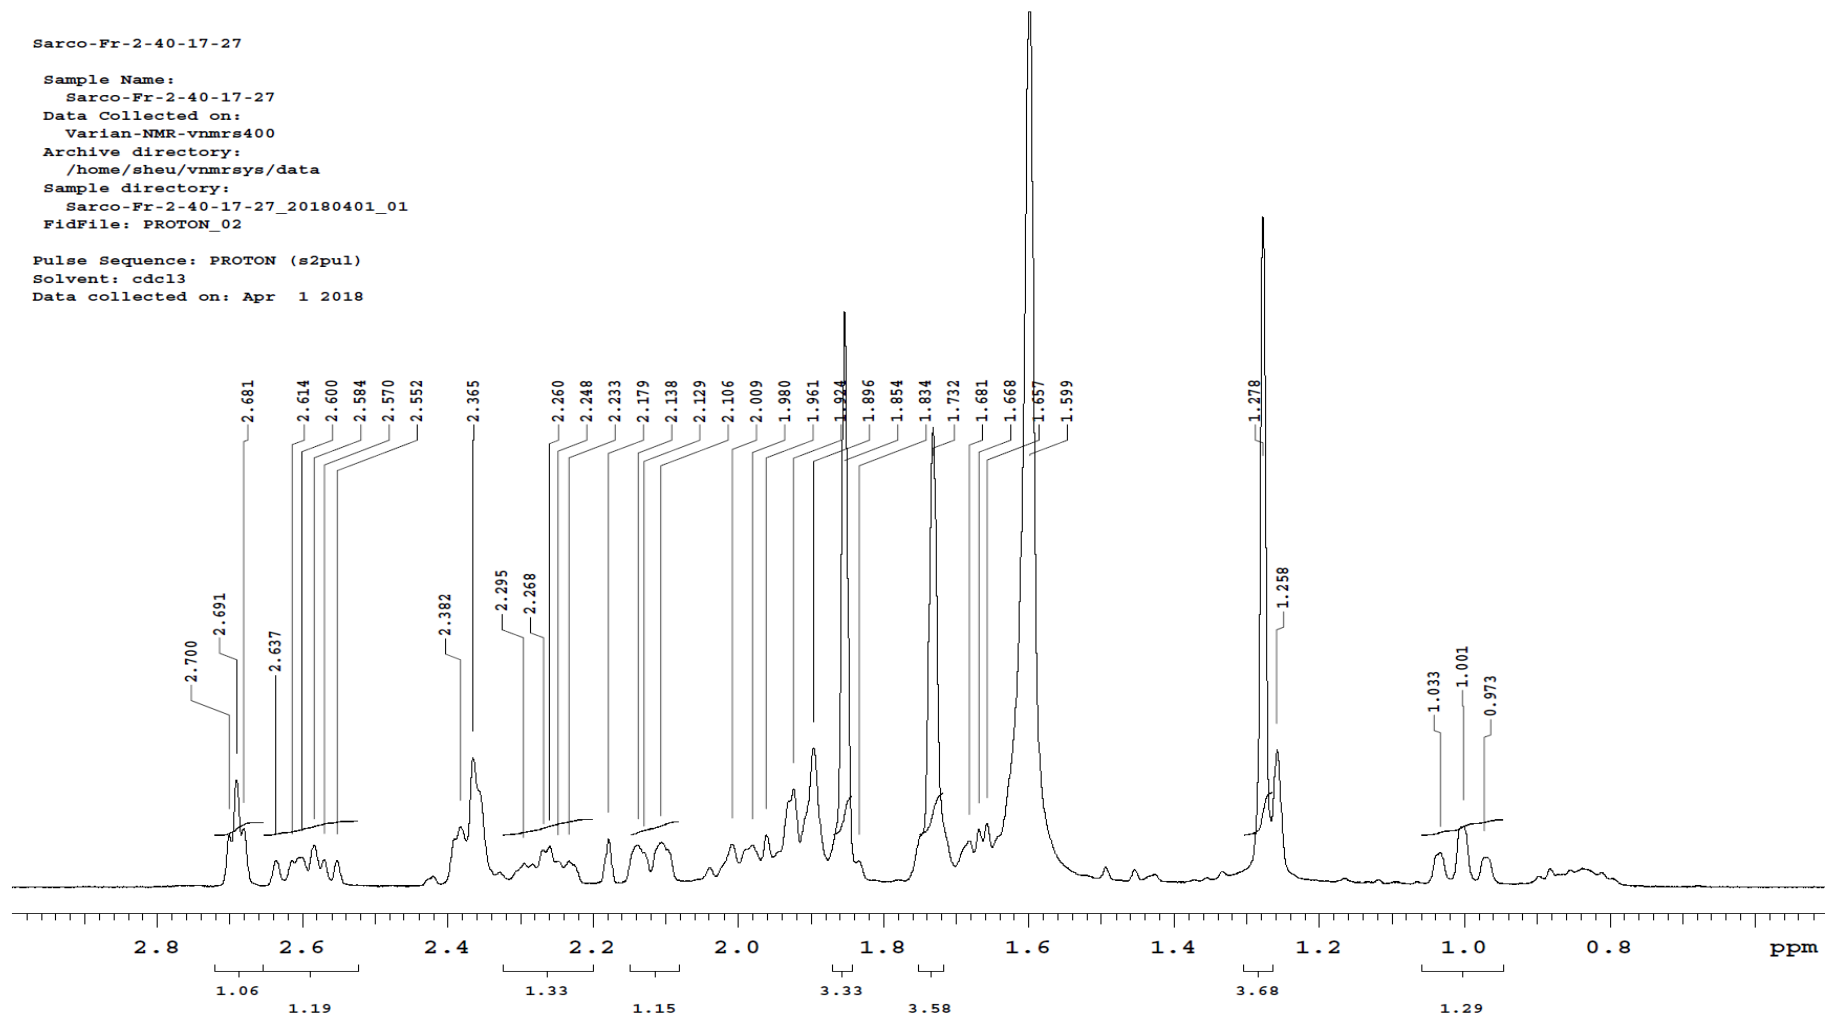

Figure S28:  $^1\text{H}$  NMR spectrum (from 0.5 to 3.0 ppm) of **3** in  $\text{CDCl}_3$  at 400 MHz

Sarco-Fr-2-40-17-27

Sample Name:  
Sarco-Fr-2-40-17-27  
Data Collected on:  
Varian-NMR-vnmrs400  
Archive directory:  
/home/sheu/vnmrsys/data  
Sample directory:  
Sarco-Fr-2-40-17-27\_20180401\_01  
FidFile: CARBON\_01

Pulse Sequence: CARBON (s2pul)  
Solvent: cdcl3  
Data collected on: Apr 1 2018

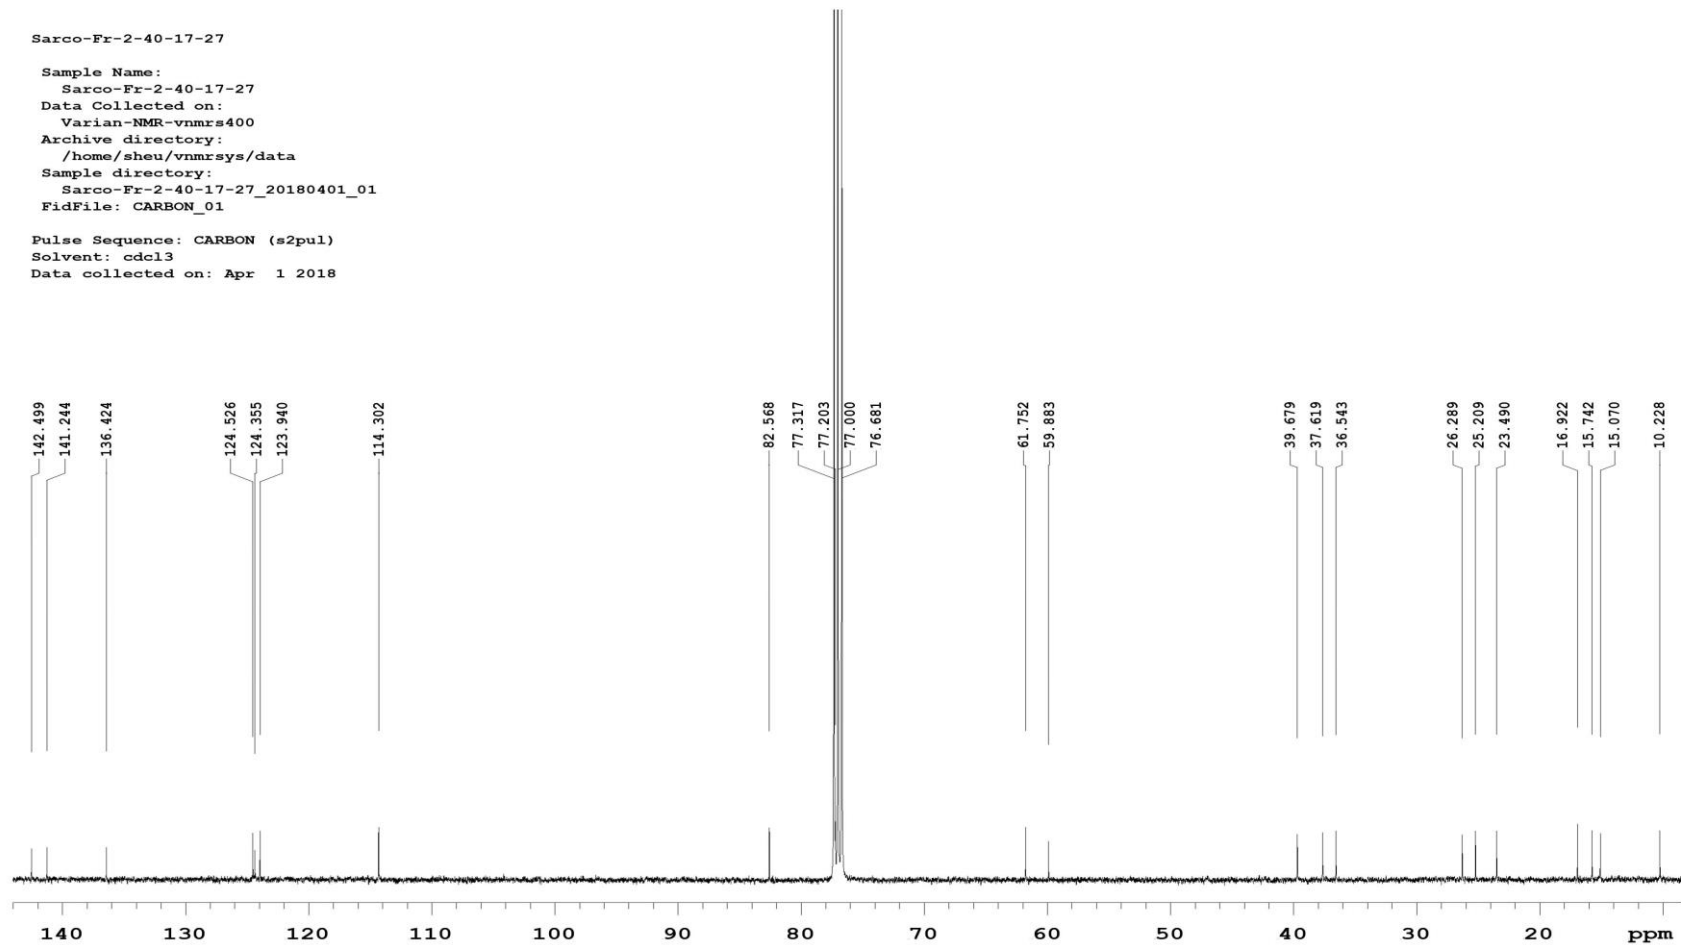

Figure S29: <sup>13</sup>C NMR spectrum of **3** in CDCl<sub>3</sub> at 100 MHz

Sarco-Fr-2-40-17-27  
Sample Name:  
Sarco-Fr-2-40-17-27  
Data Collected on:  
Varian-NMR-vnmrs400  
Archive directory:  
/home/sheu/vnmrsys/data  
Sample directory:  
Sarco-Fr-2-40-17-27\_20180401\_01  
FidFile: DEPT\_01  
Pulse Sequence: DEPT  
Solvent: cdcl3  
Data collected on: Apr 1 2018

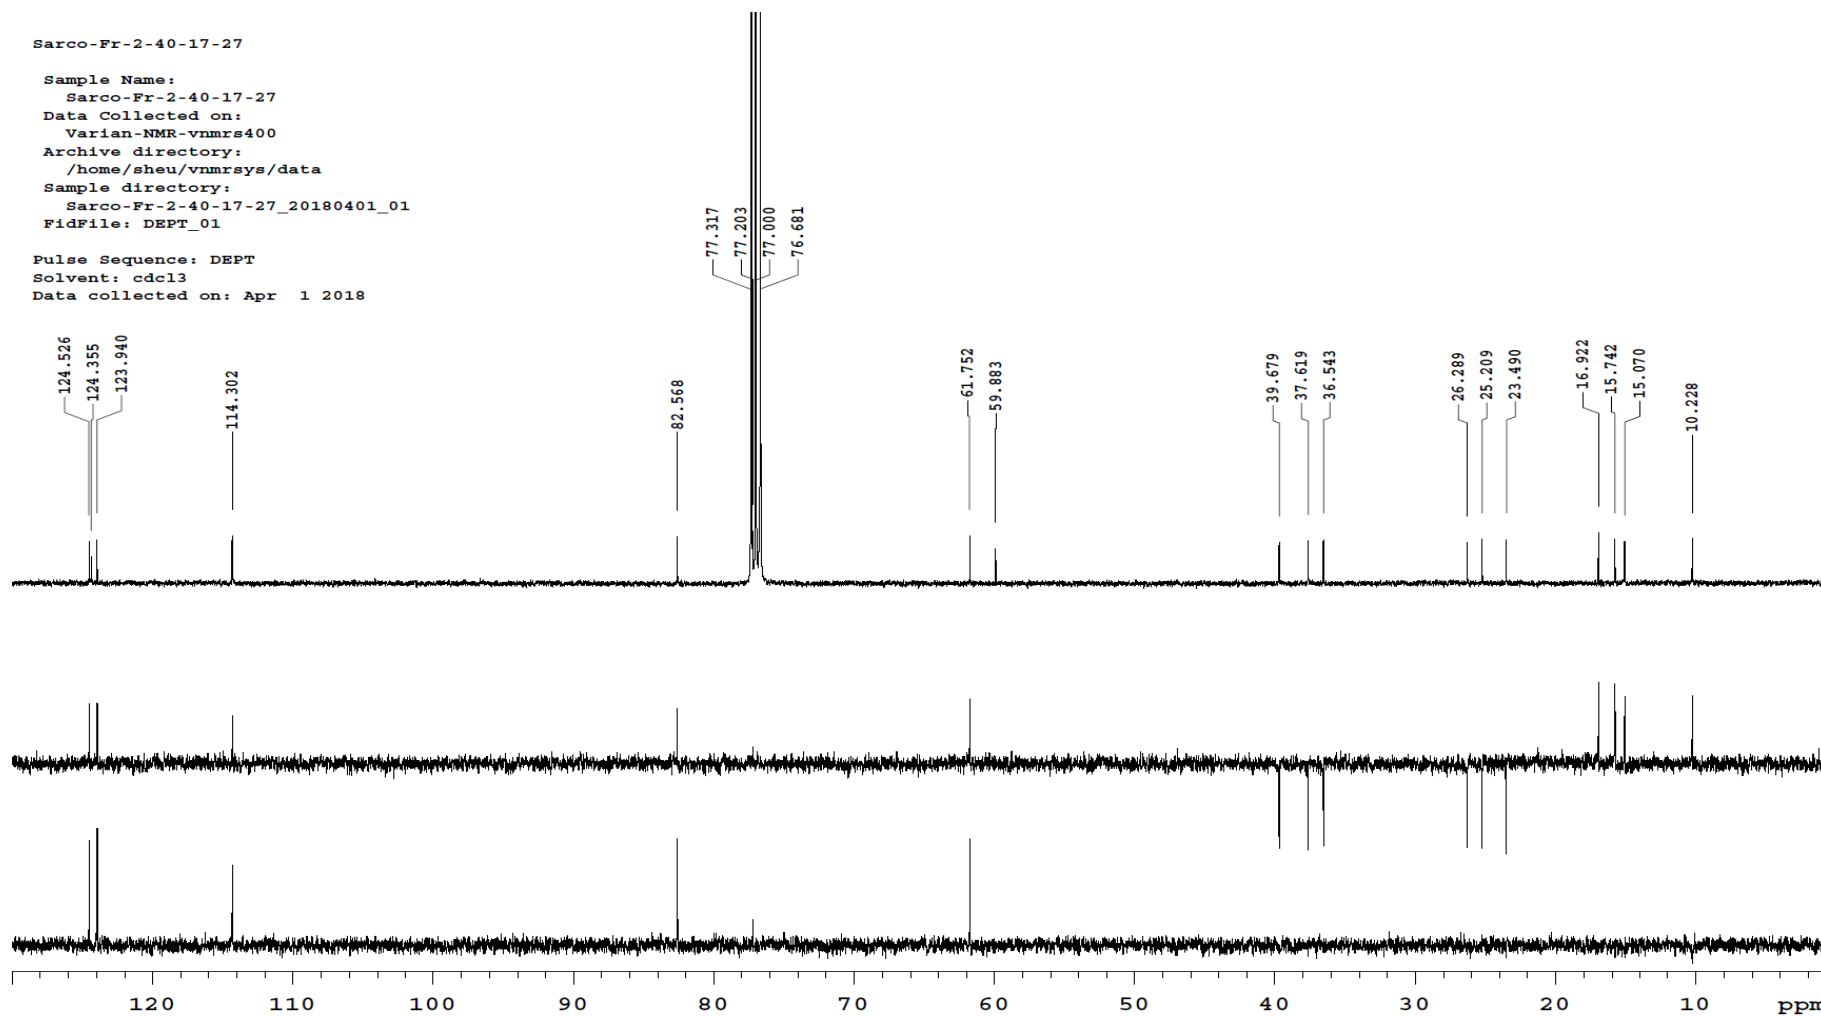

Figure S30: DEPT spectrum of 3

Sarco-Fr-2-40-17-27

Sample Name:  
Sarco-Fr-2-40-17-27  
Data Collected on:  
Varian-NMR-vnmrs400  
Archive directory:  
/home/sheu/vnmrsys/data  
Sample directory:  
Sarco-Fr-2-40-17-27\_20180401\_01  
FidFile: HSQCAD\_01

Pulse Sequence: HSQCAD  
Solvent: cdcl3  
Data collected on: Apr 1 2018

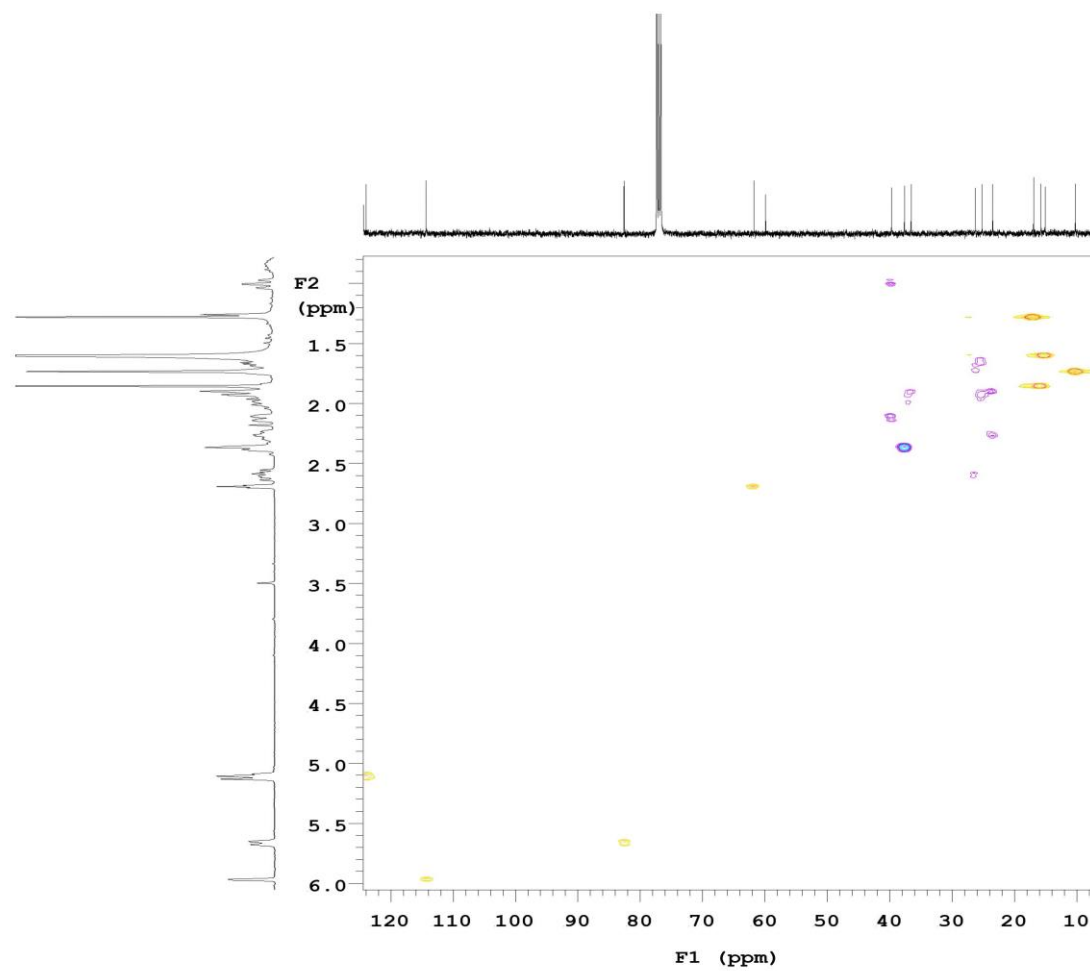

Figure S31: HSQC spectrum of 3

Sarco-Fr-2-40-17-27

Sample Name:

Sarco-Fr-2-40-17-27

Data Collected on:

Varian-NMR-vnmrs400

Archive directory:

/home/sheu/vnmrsys/data

Sample directory:

Sarco-Fr-2-40-17-27\_20180401\_01

FidFile: gCOSY\_01

Pulse Sequence: gCOSY

Solvent: cdcl3

Data collected on: Apr 1 2018

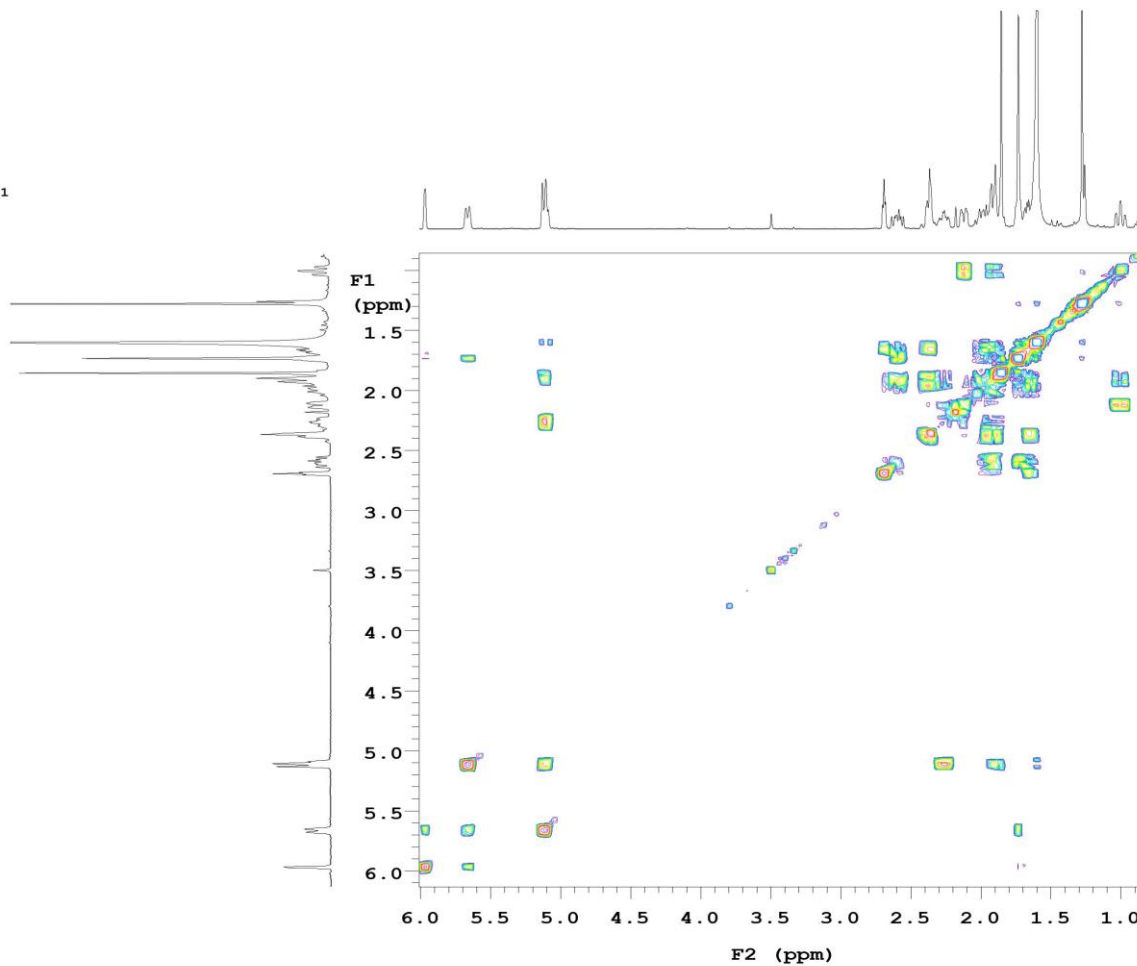

Figure S32: COSY spectrum of 3

Sarco-Fr-2-40-17-27

Sample Name:

Sarco-Fr-2-40-17-27

Data Collected on:

Varian-NMR-vnmrs400

Archive directory:

/home/sheu/vnmrsys/data

Sample directory:

Sarco-Fr-2-40-17-27\_20180401\_01

FidFile: gHMBCAD\_01

Pulse Sequence: gHMBCAD

Solvent: cdcl3

Data collected on: Apr 2 2018

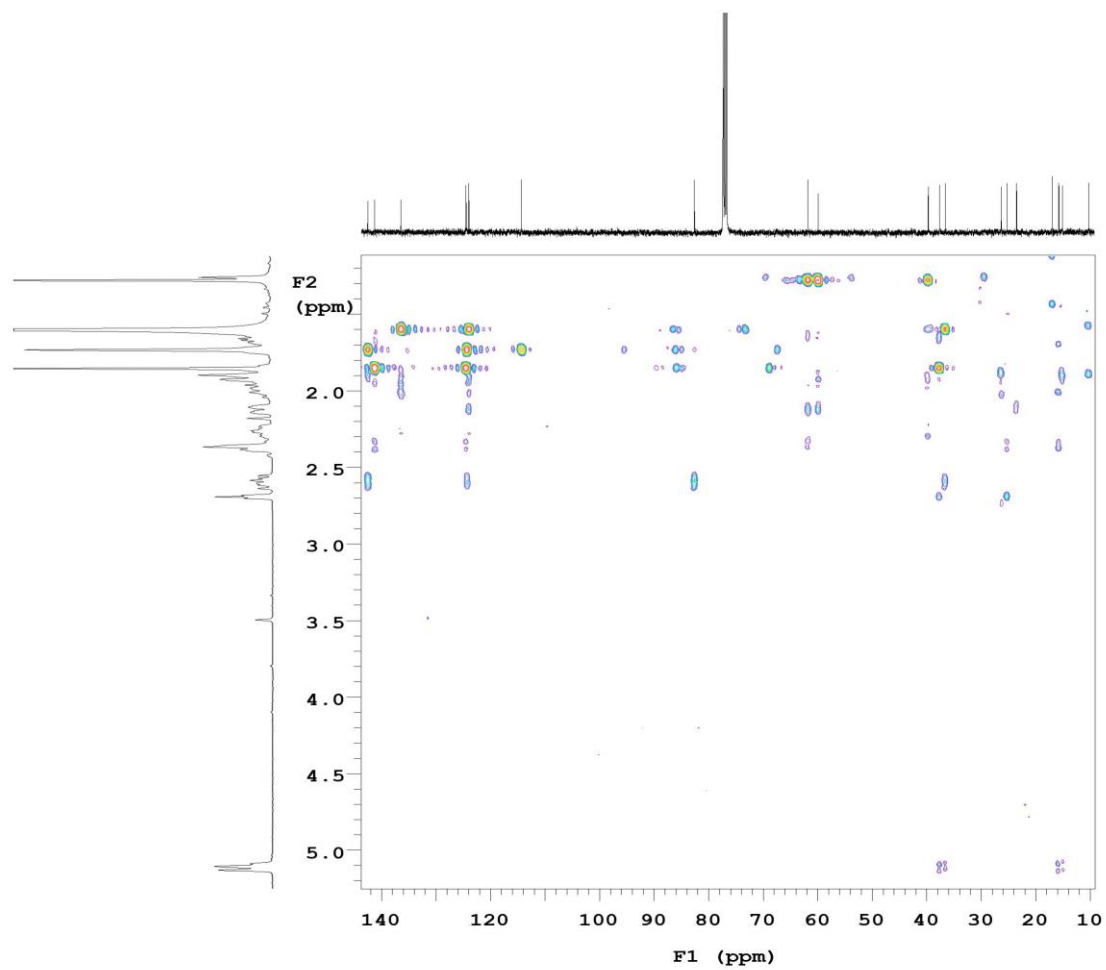

Figure S33: HMBC spectrum of 3

Sarco-Fr-2-40-17-27

Sample Name:

Sarco-Fr-2-40-17-27

Data Collected on:

Varian-NMR-vnmrs400

Archive directory:

/home/sheu/vnmrsys/data

Sample directory:

Sarco-Fr-2-40-17-27\_20180401\_01

FidFile: NOESY\_01

Pulse Sequence: NOESY

Solvent: cdcl3

Data collected on: Apr 2 2018

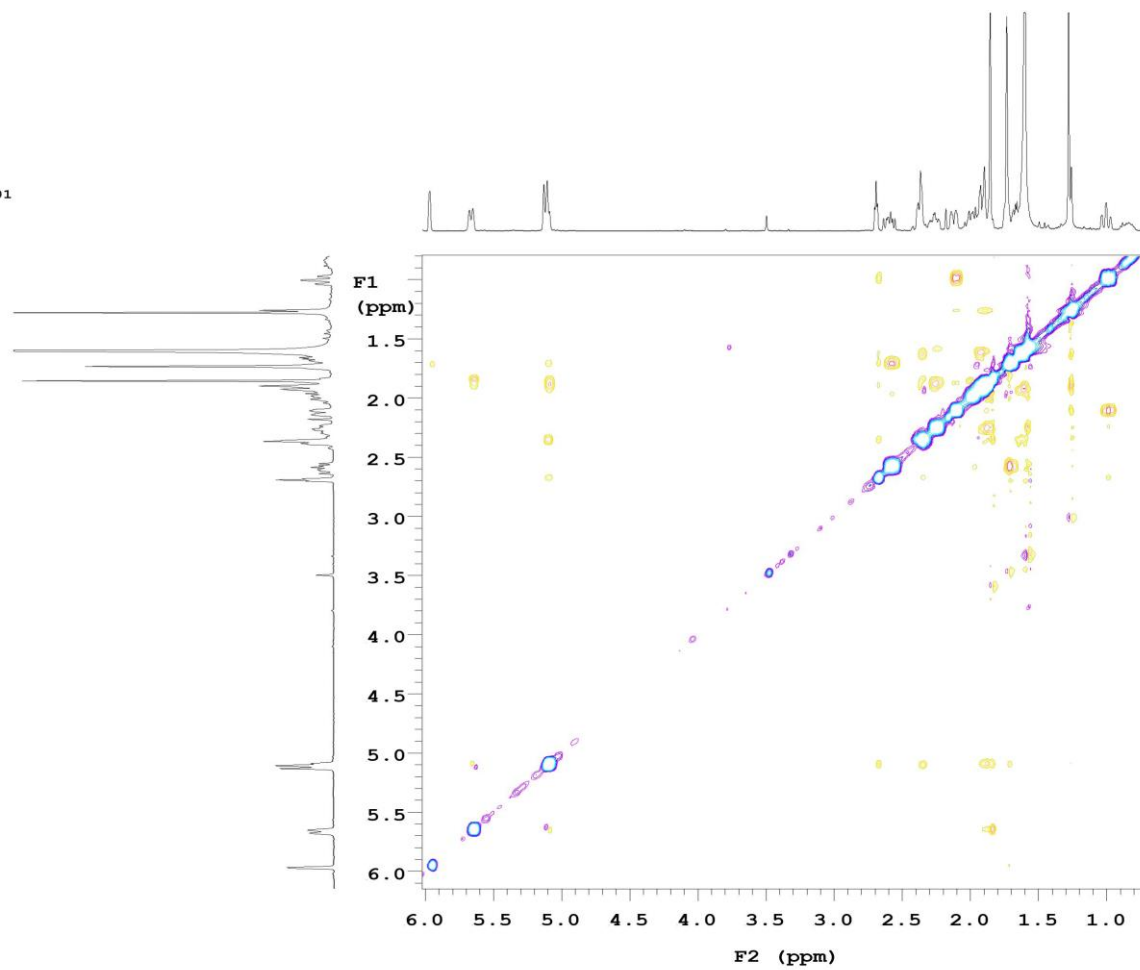

Figure S34: NOESY spectrum of 3



# Compound 4 spectroscopic data

## FT-MS

### Analysis Info

Analysis Name D:\Data\1\F110852\_000002.d  
Method broadband first signal  
Sample Name Sarco-fr-2-42  
Comment ESI Positive

3/30/2016 1:51:40 PM

Instrument: FT-MS solarix

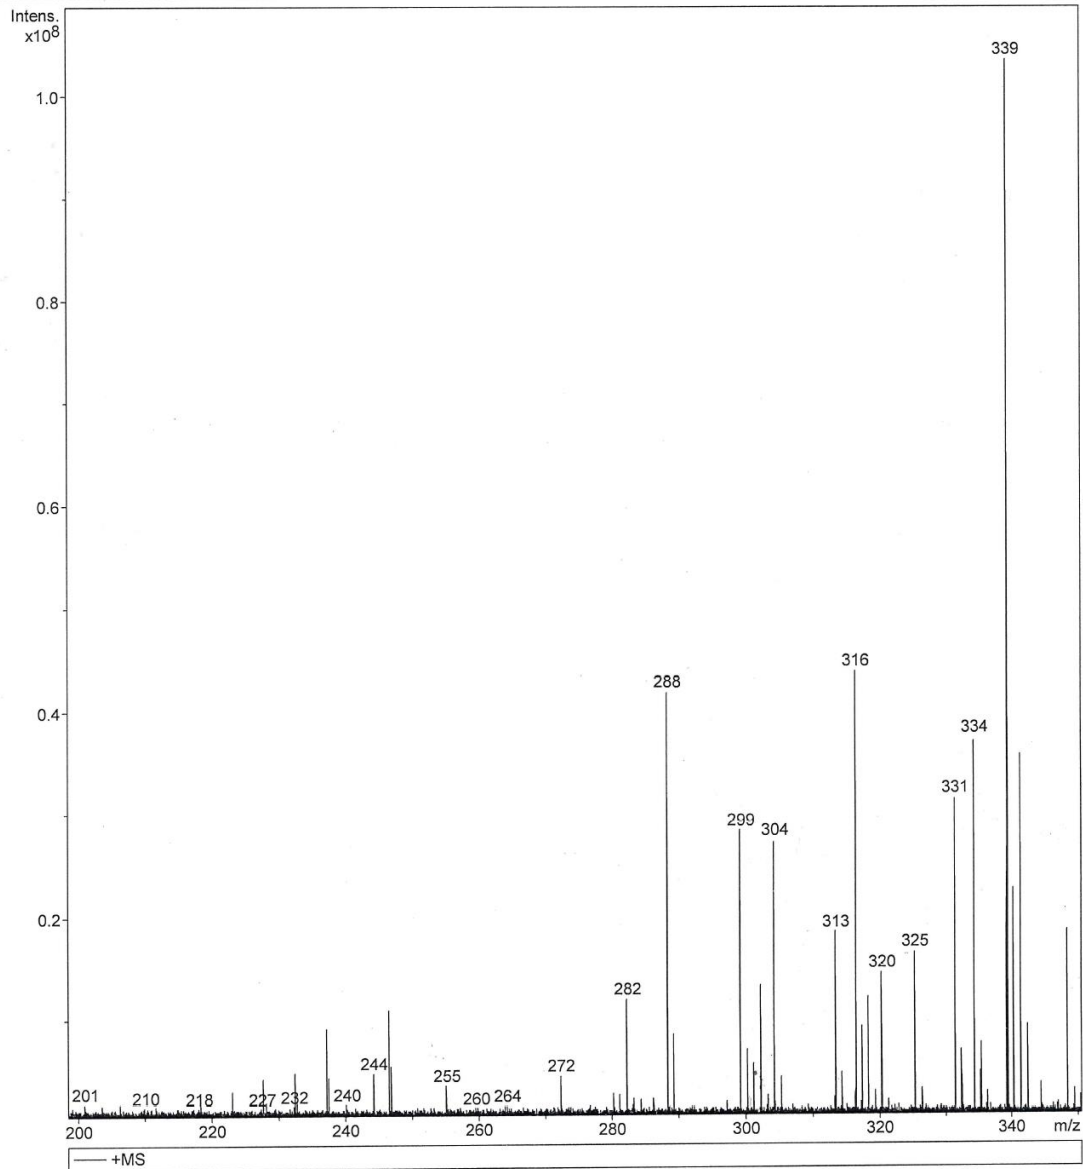

Figure S35: ESIMS spectrum of 4

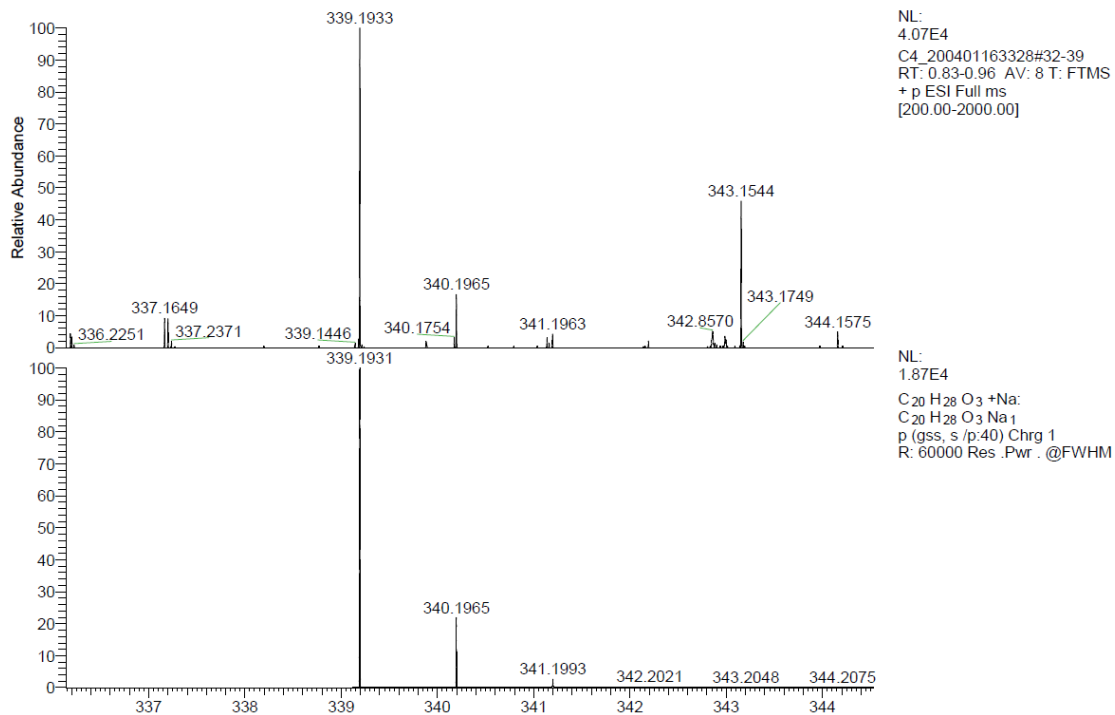

Figure S36: HRESIMS spectrum of 4

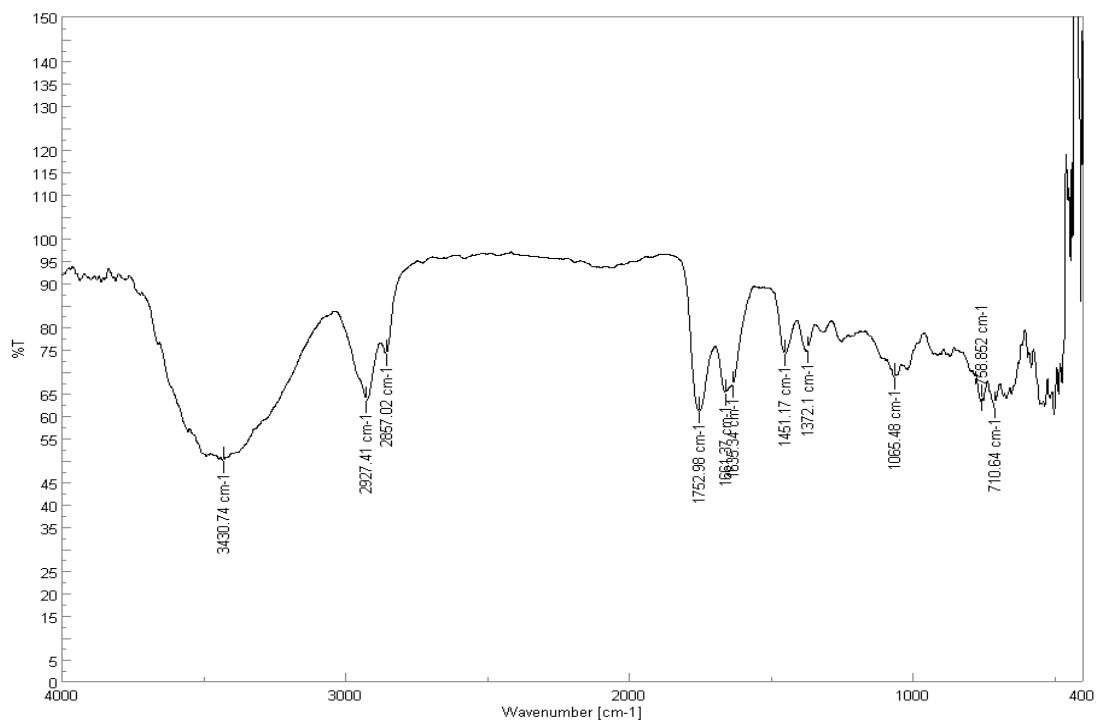

Figure S37: IR spectrum of 4

Sarco-Fr-2-42

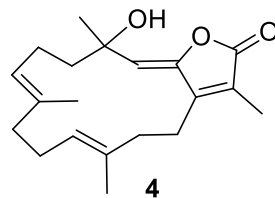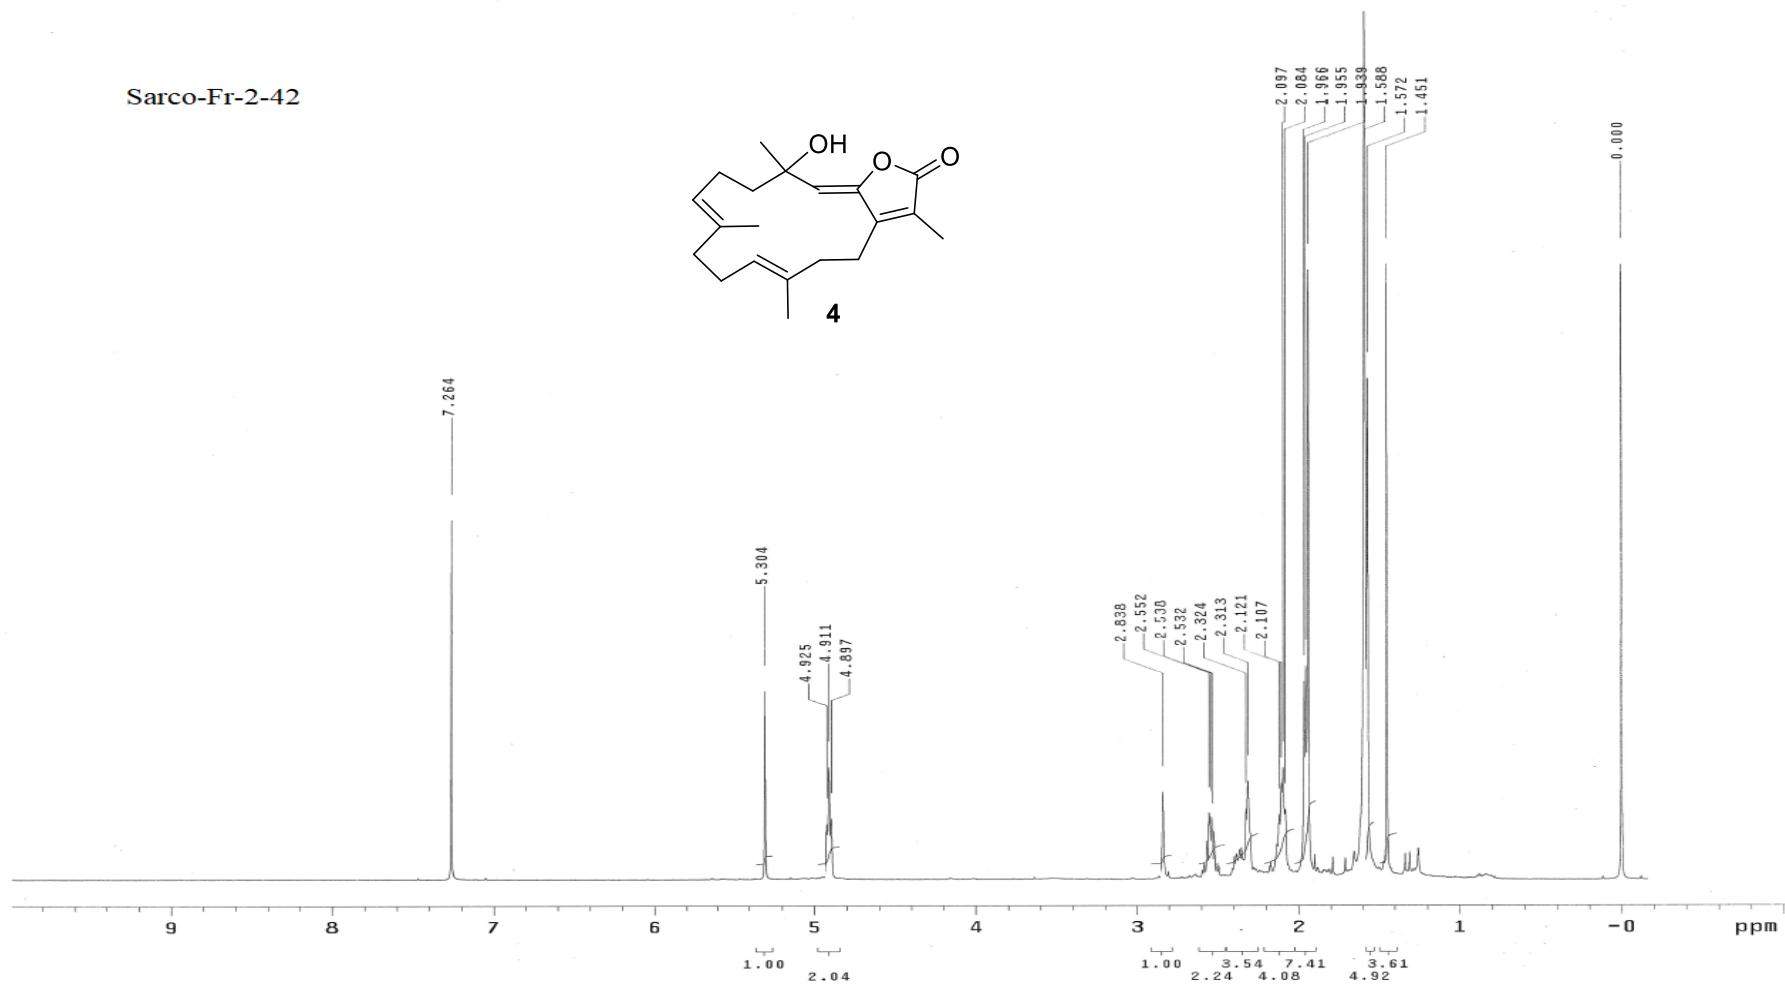

Figure S38: <sup>1</sup>H NMR spectrum of 4 in CDCl<sub>3</sub> at 500 MHz

Sarco-Fr-2-42

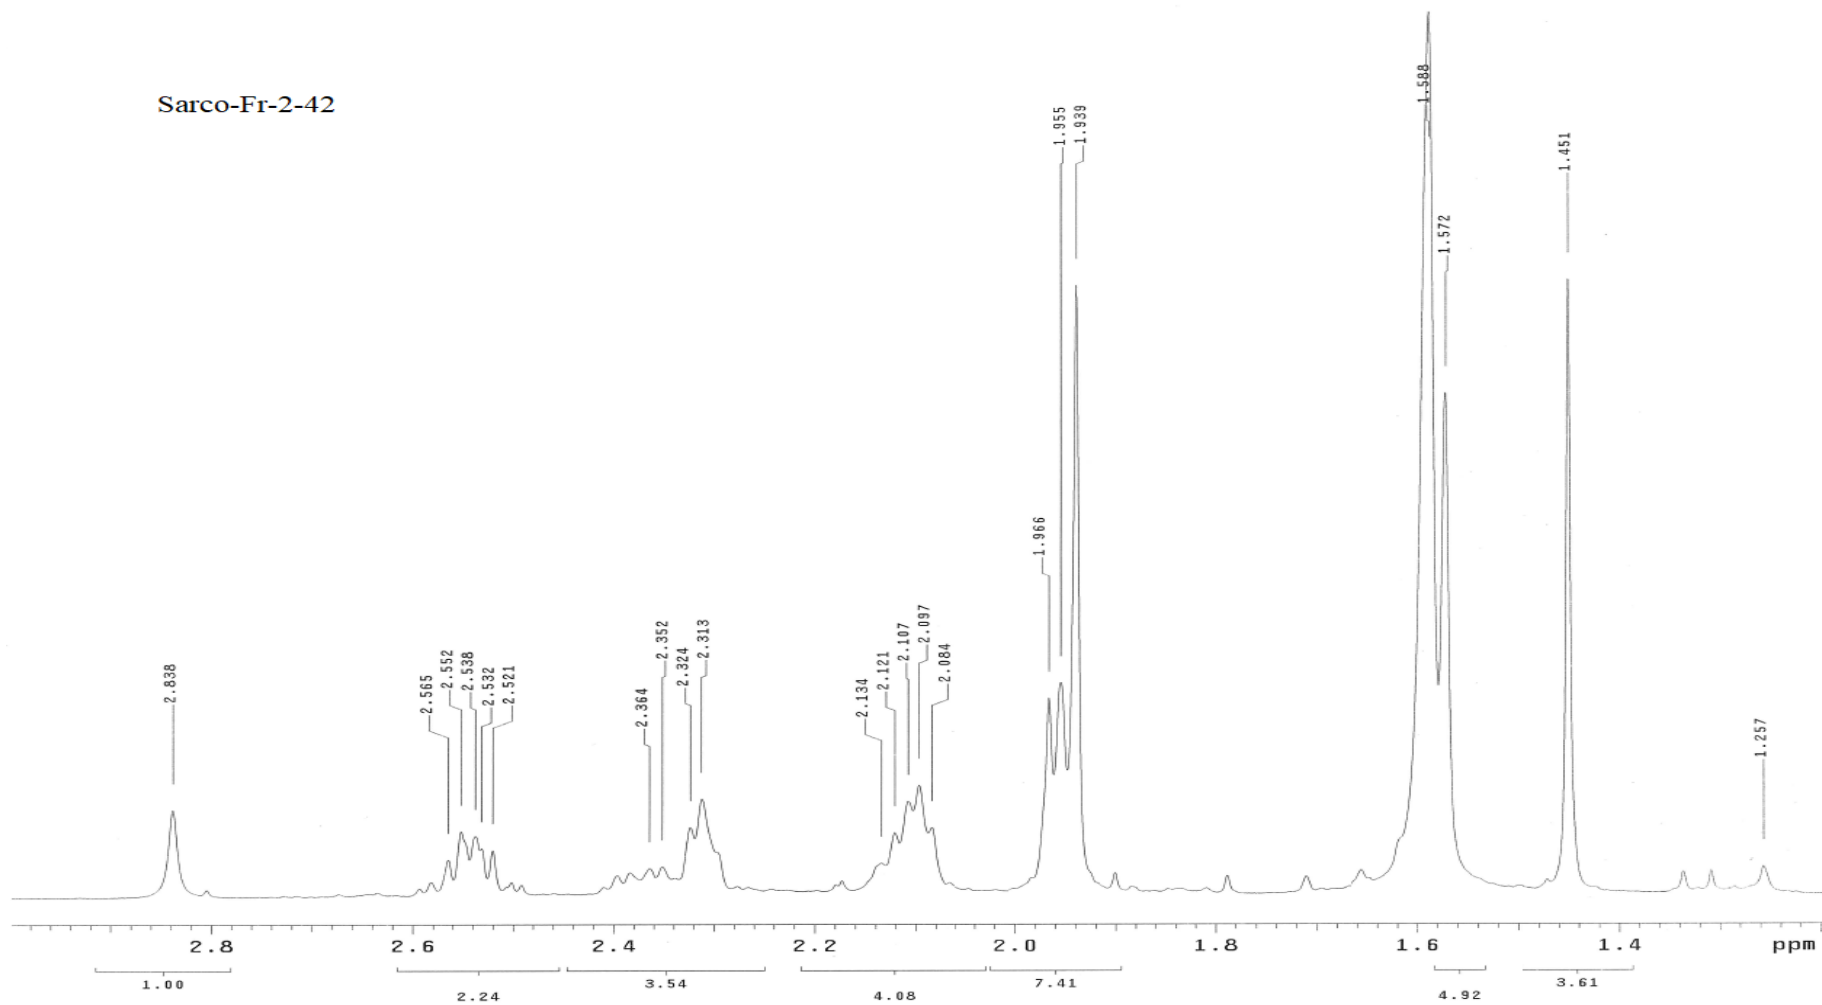

Figure S39: <sup>1</sup>H NMR spectrum (from 1.2 to 3.0 ppm) of **4** in CDCl<sub>3</sub> at 500 MHz

Sarco-Fr-2-42

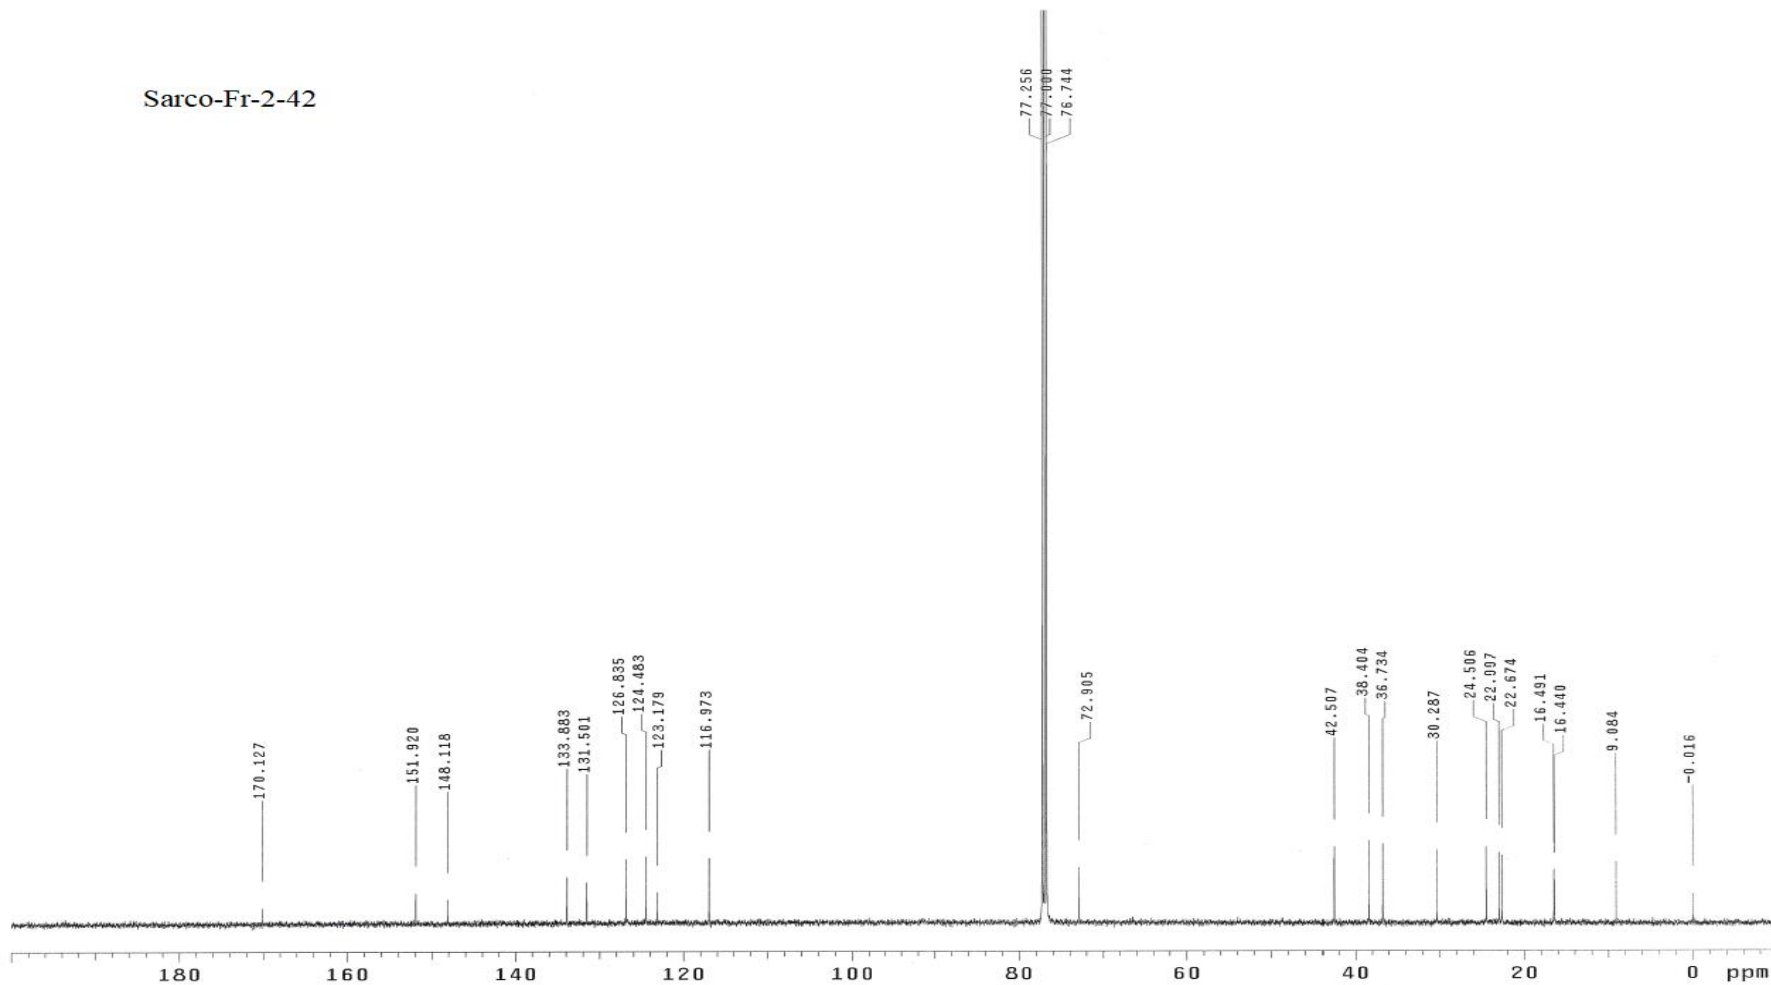

Figure S40: <sup>13</sup>C NMR spectrum of **4** in CDCl<sub>3</sub> at 125 MHz

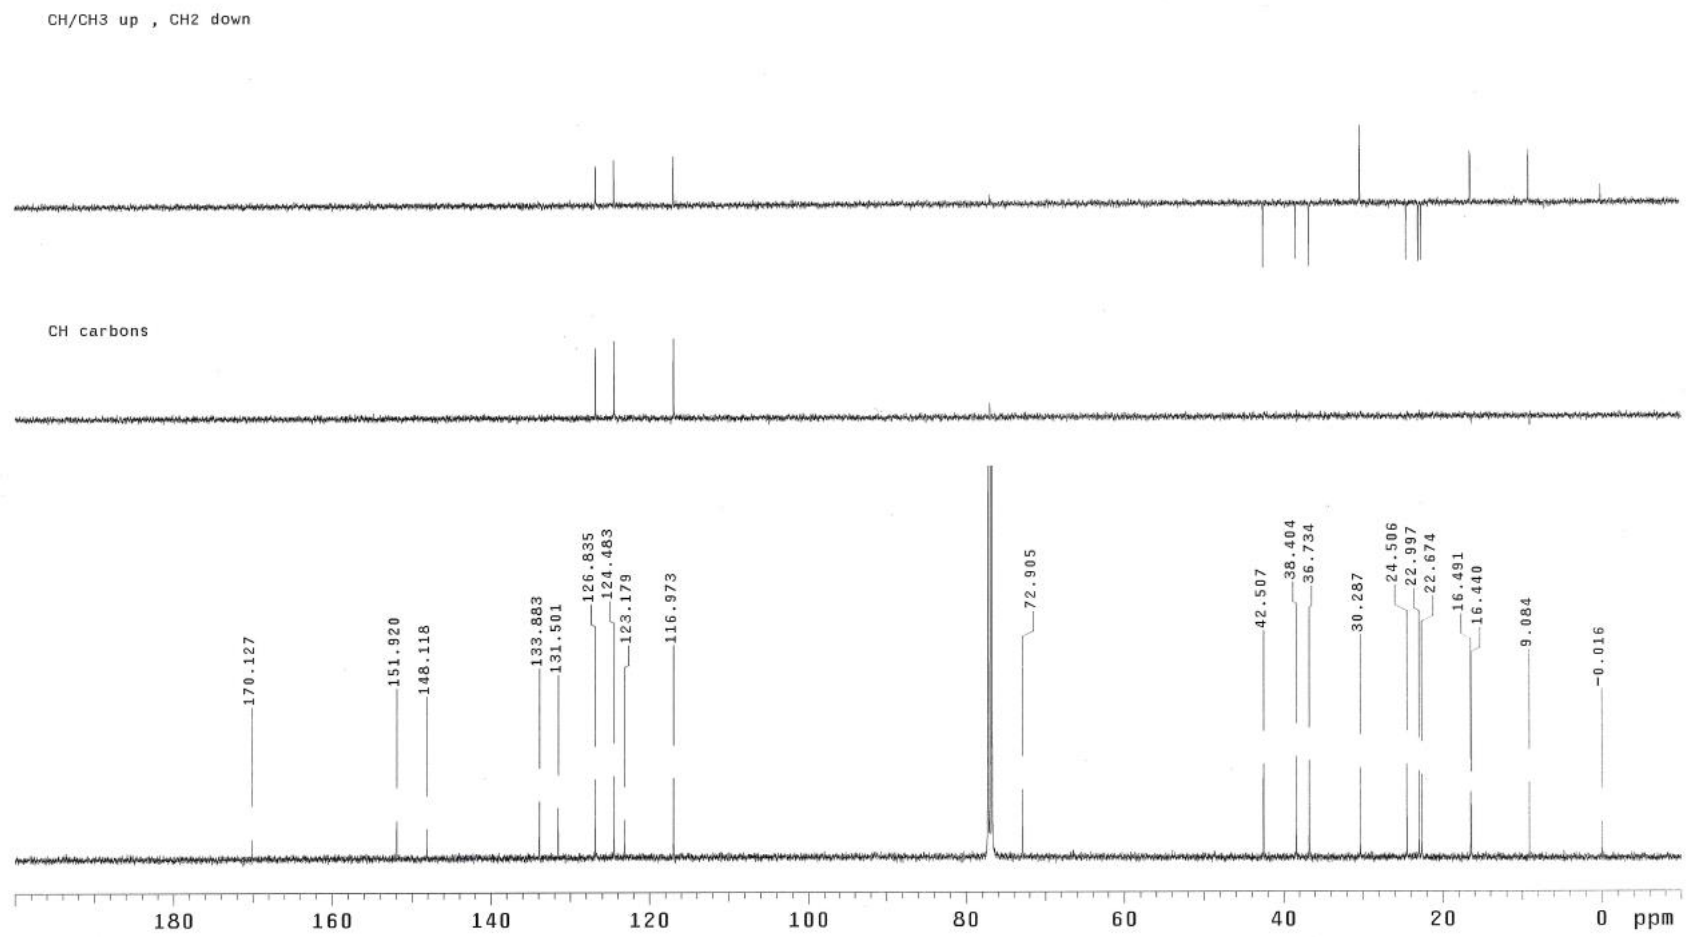

Figure S41: DEPT spectrum of 4

Sarco-Fr-2-42

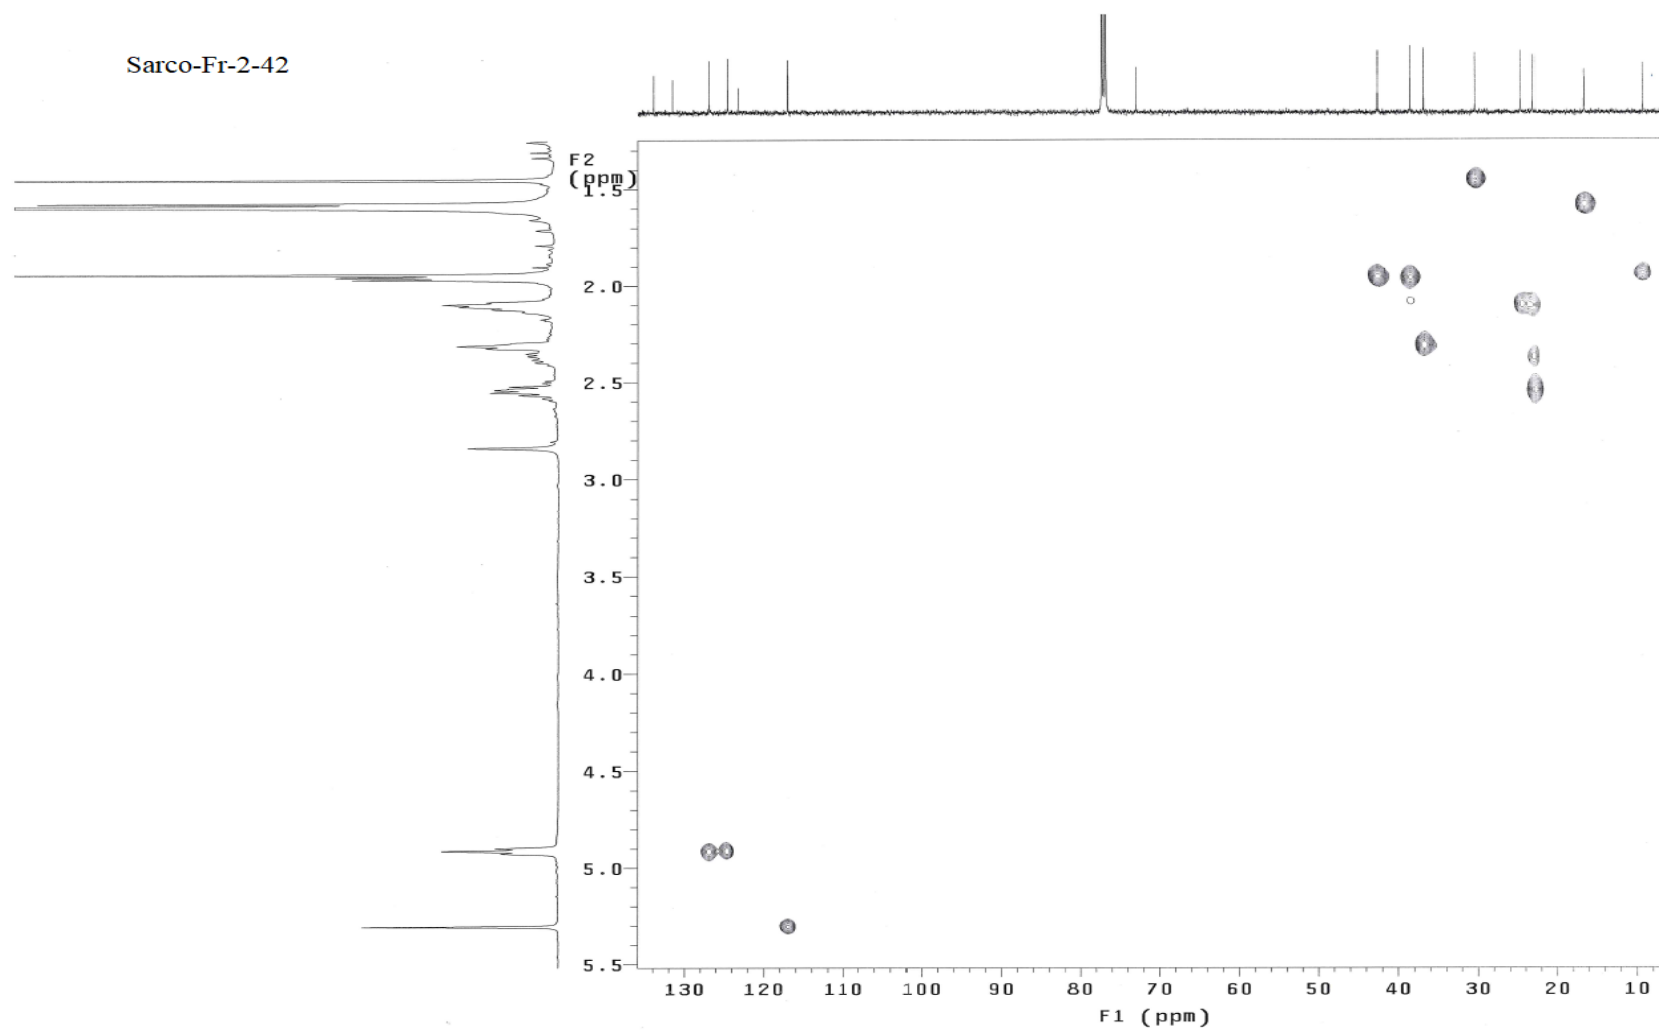

Figure S42: HSQC spectrum of 4

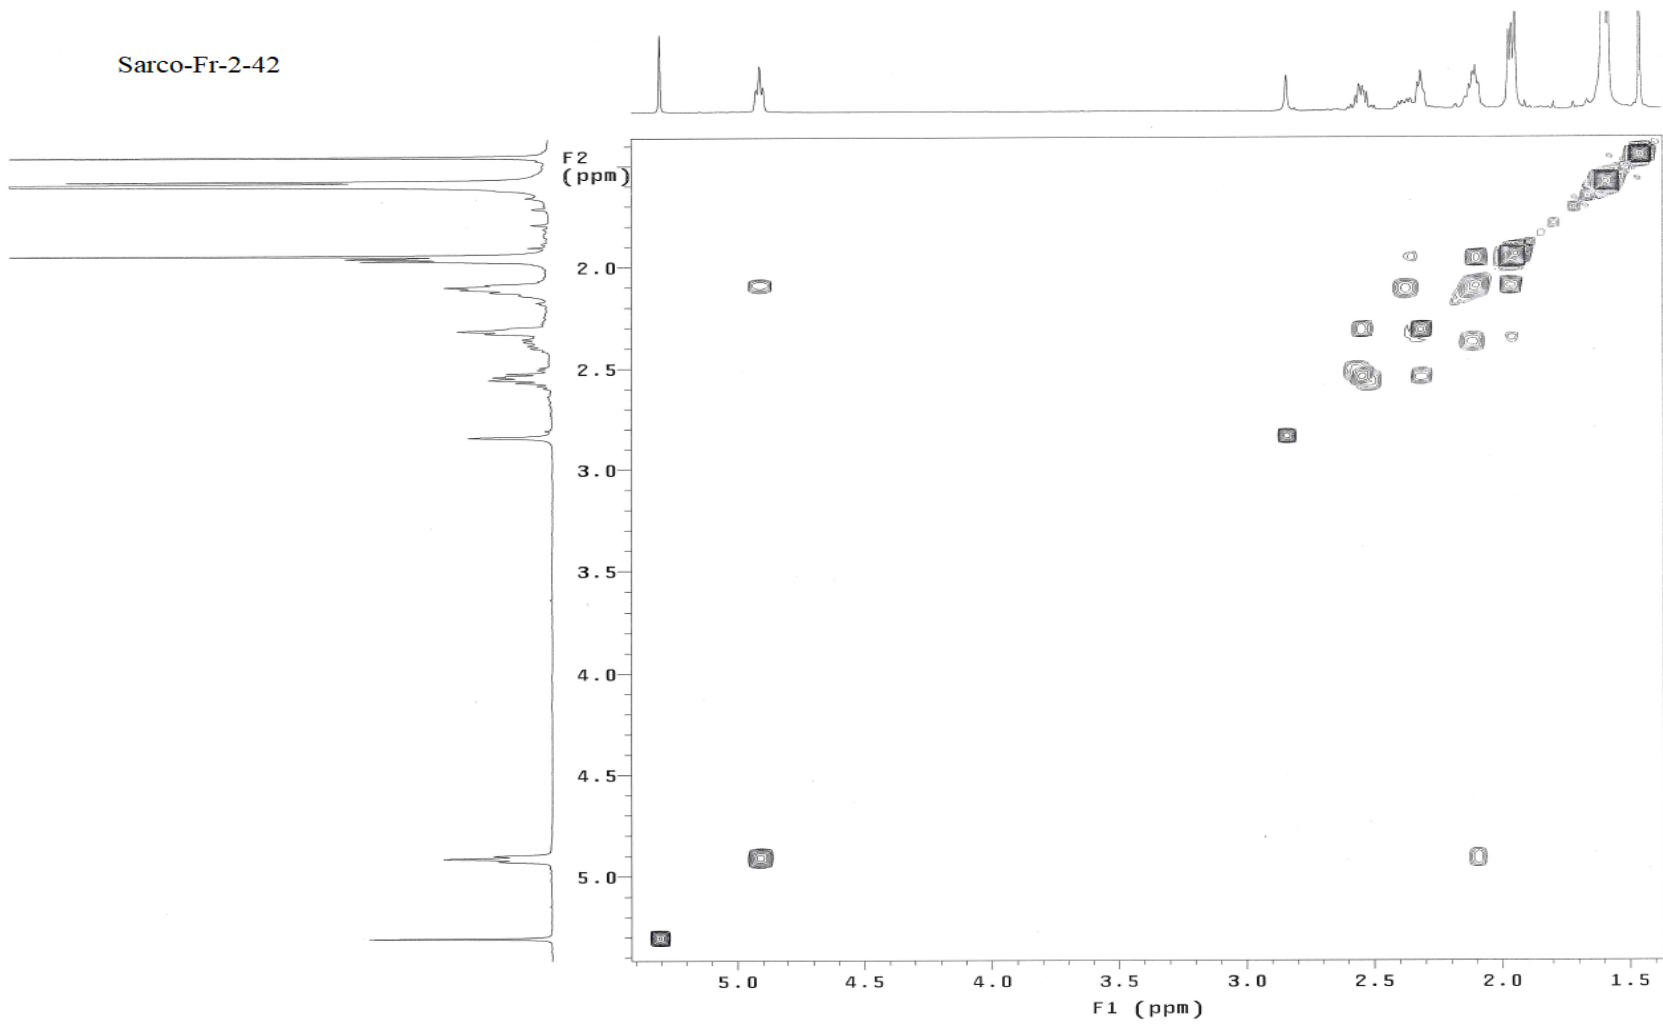

Figure S43: COSY spectrum of 4



Sarco-Fr-2-42

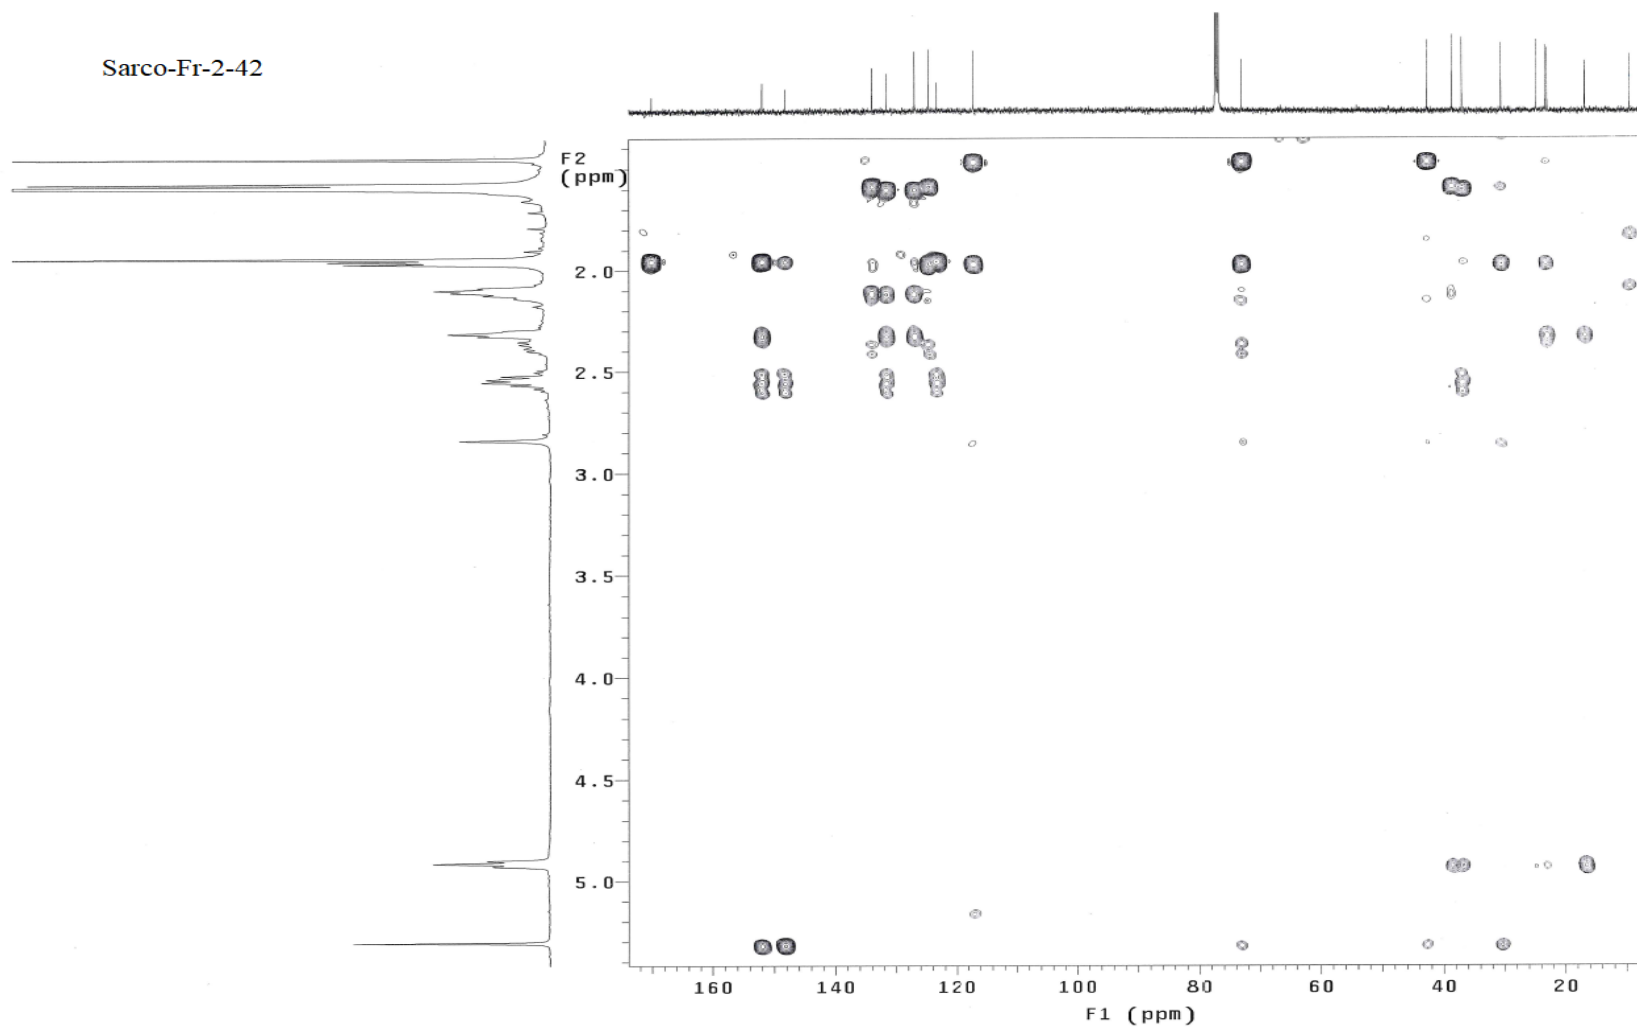

Figure S44: HMBC spectrum of 4

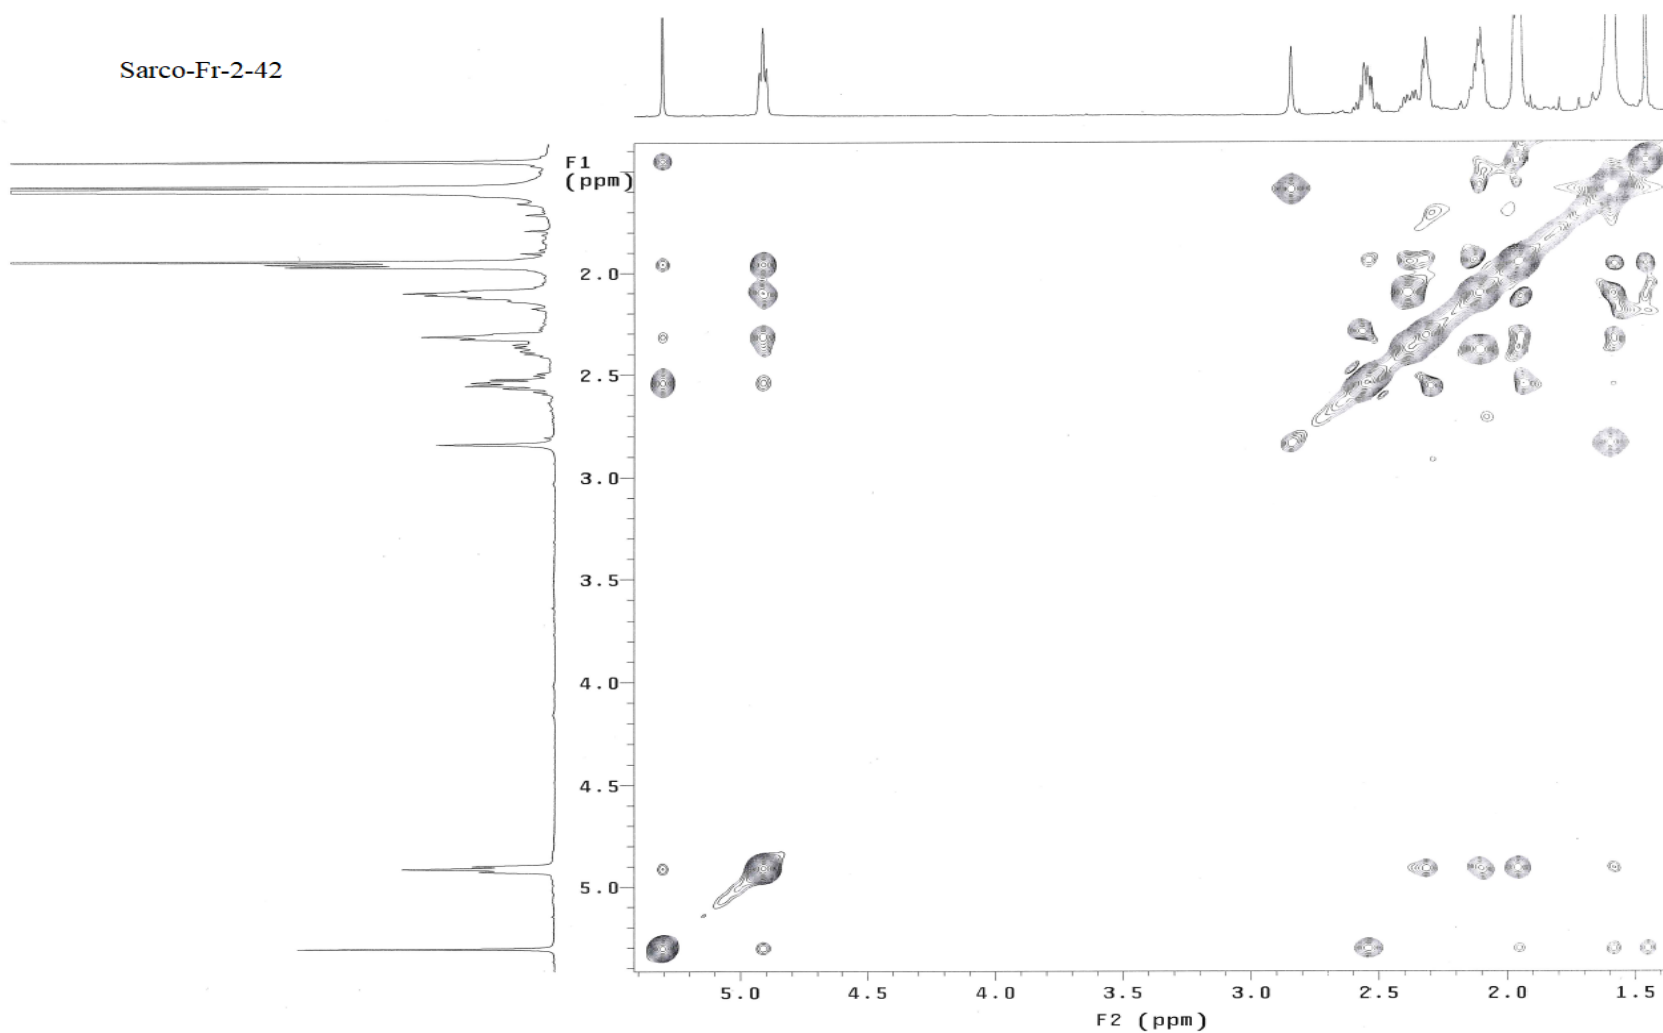

Figure S45: NOESY spectrum of 4
